# 1 Photoreceptor calyceal processes accompany the developing 2 outer segment, adopting a stable length despite a dynamic core

3 **Maria Sharkova<sup>1</sup>, Gonzalo Aparicio<sup>2,3</sup>, Constantin Mouzaaber<sup>1</sup>, Flavio R Zolessi<sup>2,3</sup>,**  
4 **Jennifer C Hocking<sup>4,1,5,6</sup>**

## 6 Abstract

8 Vertebrate photoreceptors detect light through a large cilium-  
9 based outer segment, which is filled with photopigment-laden  
10 membranous discs. Surrounding the base of the outer segment  
11 are microvilli-like calyceal processes (CPs). While CP disruption  
12 has been associated with altered outer segment morphology  
13 and photoreceptor degeneration, the role of the processes  
14 remains elusive. Here, we used zebrafish as a model to char-  
15 acterize CPs. We quantified CP parameters and report a strong  
16 disparity in outer segment coverage between photoreceptor  
17 subtypes. CP length is stable across light and dark conditions,  
18 while heat shock inducible expression of tagged actin revealed  
19 rapid turnover of the CP actin core. Detailed imaging of the  
20 embryonic retina uncovered substantial remodeling of the devel-  
21 oping photoreceptor apical surface, including a transition from  
22 dynamic tangential processes to vertically-oriented CPs imme-  
23 diately prior to outer segment formation. Remarkably, we also  
24 found a direct connection between apical extensions of the  
25 Müller glia and retinal pigment epithelium, arranged as bun-  
26 dles around the ultraviolet sensitive cones. In summary, our  
27 data characterize the structure, development, and surrounding  
28 environment of photoreceptor microvilli in the zebrafish retina.

29 **KEYWORDS: photoreceptors, actin, microvilli, zebrafish, retinal**  
30 **pigment epithelium, Müller glia**

## 32 INTRODUCTION

33 Microvilli extend from the apical cell surface as finger-like protru-  
34 sions supported by a core of filamentous actin (F-actin) (Nambiar  
35 et al., 2010). In the small intestine and renal proximal convo-  
36 luted tubule, thousands of microvilli together form a brush border,  
37 thereby massively increasing the surface area of the cell for trans-  
38 port of solutes between the lumen and intracellular space (Crawley  
39 et al., 2014; Coudrier et al., 1988). Sensory cells can also extend  
40 microvilli, although of varying morphologies and purposes. Best  
41 studied are the stereocilia of the inner ear hair cells, which con-  
42 tain thick actin bundles and are arranged in rows of increasing  
43 heights (Tilney et al., 1992; Barr-Gillespie, 2015). Stereocilia are

deflected upon auditory or vestibular stimulation, leading to the  
opening of gated ion channels, cell depolarization, and activation  
of the associated sensory nerve.

Light sensation by retinal photoreceptors is mediated by the  
outer segment (OS), an enlarged and modified microtubule-based  
cilium packed with photopigment-laden membranous discs (Gold-  
berg et al., 2016). The base of the OS is surrounded by a ring  
of microvilli known as calyceal processes (CPs) and presumed to  
have a supportive, non-sensory role. CPs extend from the apical  
surface of the inner segment (IS), which houses organelles such  
as the mitochondria and endoplasmic reticulum and performs the  
metabolic functions of the cell.

Although first described in the 19<sup>th</sup> century, the functions of  
CPs remain uncertain (Schultze, 1872). CPs are found in a wide  
range of species, including fish and humans (Nagle et al., 1986;  
Sahly et al., 2012). Certain rodents such as mice and rats lack CPs  
altogether or possibly have a single large “tongue-like” CP or a few  
vestigial protrusions (Sahly et al., 2012; Volland et al., 2015). CPs  
house an actin core that is continuous with rootlets extending deep  
into the IS and, at least in some cases, anchoring at the outer lim-  
iting membrane (OLM), the location of junctions between Müller  
glial processes and photoreceptor ISs (Nagle et al., 1986; Williams  
et al., 1990).

Rod photoreceptors, responsible for vision in dim light, have  
a rod-shaped OS where the discs are discrete units fully enclosed  
within the plasma membrane (Goldberg et al., 2016). In the OSs  
of cones, which mediate high-acuity colour vision, the discs are  
lamellae continuous with one another and the plasma membrane of  
the IS. Photoreceptors are long-lived cells that in humans cannot  
regenerate. Nevertheless, the burden of oxidative damage is miti-  
gated by the continuous turnover of the OS through creation of new  
discs on the basal side and removal of old discs at the apical tip  
through phagocytosis by the adjacent retinal pigment epithelium  
(RPE). One proposed function of CPs is as a barrier to restrain the  
growth of nascent discs (Schietroma et al., 2017). Indeed, disrup-  
tion of CPs was previously associated with the overgrowth of basal  
discs in rods.

The significance for CPs in supporting vision was highlighted  
by their association with Usher syndrome, the most common form  
of inherited combined hearing and vision loss (Sahly et al., 2012).  
USH type 1 (USH1) is characterized by severe congenital hear-  
ing loss and prepubertal onset of retinitis pigmentosa (El-Amraoui  
and Petit, 2014). The hearing deficits caused by lack of USH1 pro-  
teins are well understood, with each contributing to the structure  
and function of inner ear stereocilia, but the retinal manifesta-  
tions are less clear, largely because the mouse mutants do not  
exhibit vision problems. It was proposed that USH1 visual deficits  
are a result of disrupted CPs, which would explain the lack of a  
mouse phenotype. Indeed, it was demonstrated that CPs in frogs  
and macaque express all six USH1 proteins: the adhesion proteins  
cadherin-23 (USH1D) and protocadherin-15 (pcdh15/USH1F), the

<sup>1</sup>Department of Cell Biology, Faculty of Medicine and Dentistry, University of Al-  
berta, Edmonton, Alberta

<sup>2</sup>Sección Biología Celular, Facultad de Ciencias, Universidad de la República,  
Uruguay

<sup>3</sup>Institut Pasteur Montevideo, Uruguay

<sup>4</sup>Division of Anatomy, Department of Surgery, Faculty of Medicine and Dentistry,  
University of Alberta, Edmonton, Alberta

<sup>5</sup>Department of Medical Genetics, Faculty of Medicine and Dentistry, University of  
Alberta, Edmonton, Alberta

<sup>6</sup>Women and Children’s Health Research Institute, University of Alberta, Edmon-  
ton, Alberta

95 scaffolding proteins harmonin (USH1C) and sans (USH1G), the  
96 actin-bundling protein espin (USH1M), and the cytoskeletal motor  
97 protein myosin 7a (USH1B) (Sahly et al., 2012). Functional data  
98 is however limited. Primarily, morpholino knockdown of *Pcdh15*  
99 in *Xenopus tropicalis* and *pchd15b* mutation in zebrafish each re-  
100 sulted in disrupted CPs and disorganized OSs (Schietroma et al.,  
101 2017; Miles et al., 2021).

102 Zebrafish have been widely adopted as a model for studying the  
103 visual system (Noel et al., 2022). The zebrafish retina exhibits the  
104 same layered organization as the human retina, except for the lack  
105 of a central fovea, and contains a mix of rods and cones ( $\approx 60\%$   
106 cones in adults (Zang and Neuhauss, 2021)). As vision-dependent  
107 predators, zebrafish use blue cones, red/green double cones, and  
108 ultraviolet-sensitive (UVS) cones for a wide spectrum of colour vi-  
109 sion. Further, the zebrafish photoreceptors are arranged in a highly  
110 organized mosaic pattern (Raymond et al., 1995).

111 Here, we characterize the CPs of zebrafish photoreceptors and  
112 surrounding structures as a basis for future research into CP func-  
113 tion. CP dimensions were analyzed across photoreceptor subtypes,  
114 with observed differences in length, width, and percent coverage  
115 of the OS. CP length is stable between light and dark conditions  
116 despite changes to height of the IS, while the actin core undergoes  
117 constant renewal. During development, photoreceptor precursors  
118 feature dynamic tangential processes that remain after differentia-  
119 tion. In addition, a unique actin dome structure was observed in the  
120 nascent IS, expanding above the OLM and serving as a platform  
121 for growing CPs. Finally, our data suggest a surprising interaction  
122 between apical processes of Müller glia and the RPE.

## 123 RESULTS

### 124 Basic CP parameters in 1 mpf zebrafish

125 By one month post fertilization (1 mpf), zebrafish rods and cones  
126 are functional and exhibit well-developed morphology; this time  
127 point was therefore chosen to perform a basic characterization of  
128 zebrafish CPs. First, we measured CP length in confocal images  
129 of eye cryosections stained with phalloidin conjugate to visual-  
130 ize F-actin (Fig. 1A,C). As the actin bundles that form the CP  
131 cores extend from roots emerging deep in the IS, we used the pres-  
132 ence of horizontal F-actin fibers visible at the IS/OS junction, just  
133 above the mitochondrial cluster, to demarcate the IS/OS boundary.  
134 Double cones were highlighted by the *zpr1* antibody and peanut  
135 agglutinin (PNA), blue cones by the anti-blue opsin antibody, UVS  
136 cones by the *sws1:GFP* transgene, and rods by the *rho:eGFP*  
137 transgene. CP length in rods was  $5.9\pm 0.6\ \mu\text{m}$ , in double cones  
138  $3.2\pm 0.3\ \mu\text{m}$ , in blue cones  $5.7\pm 0.3\ \mu\text{m}$ , and in UVS cones  $6.6\pm$   
139  $0.9\ \mu\text{m}$ . Interestingly, plotting of CP length relative to OS length  
140 revealed that CPs of rods and double cones exhibit  $\approx 30\%$  OS cov-  
141 erage, whereas the blue and UVS cone OSs are almost completely  
142 enveloped by CPs ( $\approx 70\text{--}80\%$ ) (Fig. 1D). Next, CP number was  
143 counted in sagittal sections of *Tg(rho:eGFP)* retinas;  $13\pm 0.9$  CPs  
144 were observed around blue cone OS and  $20\pm 0.9$  CPs around dou-  
145 ble cones (Fig. 1B). Photoreceptor type was identified based on  
146 position within the photoreceptor layer, unique OS shape, and ex-  
147 clusion of rods (labeled by GFP). Rod and UVS cone phalloidin  
148 staining was substantially weaker and did not allow for consistent  
149 assessment. When analyzing transmission electron microscopy  
150 (TEM) sections (Fig. 1E,F,F' and Fig. S1A,B), double cone CP di-  
151 ameter was significantly larger ( $149\pm 23\ \text{nm}$ ) than of UVS cones  
152 and rods ( $122\pm 18\ \text{nm}$  and  $131\pm 17\ \text{nm}$ , respectively), which may  
153 account for the difference in actin staining.

Together, these data demonstrate that CP parameters can vary  
and suggest potentially different roles depending on the photore-  
ceptor subtype.

### CP length is constant during photoadaptation

154  
155  
156  
157  
158  
159  
160  
161  
162  
163  
164  
165  
166  
167  
168  
169  
170  
171  
172  
173  
174  
175  
176  
177  
178  
179  
180  
181  
182  
183  
184  
185  
186  
187  
188  
189  
190

Teleosts undergo retinomotor movements as an adaptation to light  
conditions (Burnside and Nagle, 1983). In the dark, rod ISs shorten  
to bring the rod OSs closer to any incoming light, while cone  
ISs elongate to move their OSs further into the RPE layer. The  
opposite occurs in the light. Additionally, RPE melanosomes  
translocate into the apical RPE processes in the light and retract  
into the cell body in the dark.

Previously, it was demonstrated that CPs in isolated green sun-  
fish rods shorten upon light adaptation (Pagh-Roehl et al., 1992).  
To compare CP length in dark-adapted (DA) and light-adapted  
(LA) 1 mpf zebrafish, we first assessed whether retinomotor move-  
ments can already be observed at this stage, as formerly shown for  
double cones (Hodel et al., 2006). We measured the distance be-  
tween the OLM and IS/OS junction in rods, as well as in double,  
blue, and UVS cones (Fig. 2A,B) and found a significant dif-  
ference between the DA and LA state for all four photoreceptor  
subtypes (Fig. 2C). As expected, rod ISs were longer in LA con-  
ditions, whereas double, blue, and UVS cone ISs were longer in  
DA zebrafish. The difference in length was most pronounced and  
observable in rods. Surprisingly, when we measured the length of  
CPs for the four photoreceptor subtypes, there was no significant  
difference between the DA and LA state (Fig. 2D). The LA rod  
CPs were mostly obscured by the pigment granules in RPE villi:  
therefore *crystal* zebrafish lacking pigment in the eye were used  
to measure rod CP length (Antinucci and Hindges, 2016). Since  
the lack of pigment could influence photoreceptor health, we com-  
pared DA rod CP length in *Tg(rho:eGFP)* and *crystal* zebrafish.  
There was no significant difference between the two groups (Fig.  
S2A,B), demonstrating that *crystal* fish are an appropriate model  
for analysis.

The data we obtained indicate CP length remains constant while  
ISs undergo retinomotor movements, implying CPs could have a  
stabilizing role to support OS translocation.

### CP precursors emerge prior to OS development

191  
192  
193  
194  
195  
196  
197  
198  
199  
200  
201  
202  
203  
204  
205  
206  
207  
208  
209  
210

Previous scanning electron micrographs of the chicken and *Xeno-*  
*pus* retina suggest that CPs emerge from the apical IS before OS  
appearance (Olson, 1979; Sahly et al., 2012; Wai et al., 2006). In  
addition, they appear to undergo a selection, where some microvilli  
are eliminated as a cilium emerges from the IS (Olson, 1979). To  
investigate early OS and CP development in zebrafish photorecep-  
tors, TEM imaging was performed. When inspecting 70 hpf (hours  
post fertilization) eyes, several stages characterized by location  
and distinct morphology were observable within each retina. Pe-  
ripheral photoreceptors were at an early stage of differentiation  
with no evidence of the apical mitochondrial clustering character-  
istic of the IS. The apical cell surfaces of the photoreceptors and  
RPE here were flat, creating a smooth interface between the two  
cells (Fig. 3A). Some of the peripheral photoreceptors exhibited  
processes on their apical surfaces, but these extended tangentially,  
parallel to the photoreceptor layer, rather than extending towards  
the RPE (Fig. 3A, arrowheads). Interestingly, RPE cells also ap-  
peared immature, with only a few pigment granules positioned  
between photoreceptors and the RPE nuclei. When moving away

211 from the periphery and towards the central retina, the interface be-  
212 tween the photoreceptors and RPE now appeared rougher, with  
213 multiple apical protrusions visible on the surface of each cell type  
214 and interdigitating with each other (Fig. 3B, arrowheads). At the  
215 same time, the photoreceptor apical domain expanded to form the  
216 IS, becoming filled with clustering mitochondria. Further, RPE  
217 granules increased in number. Still, most photoreceptors lacked  
218 a budding cilium. In areas closer to the ventronasal patch and  
219 dorsocentral region, where cells differentiate earliest (Schmitt and  
220 Dowling, 1999), we observed large ISs with dense mitochondrial  
221 clusters and newly forming OSs bordered by CPs (Fig. 3C, arrow).  
222 In addition, some cells had a cilium emerging from the IS surface.  
223 The nascent photoreceptor cilia were swollen, as previously doc-  
224 umented (Nilsson, 1964b), and grew directly into the RPE layer,  
225 such that the cilium was enveloped by an RPE pocket. Interest-  
226 ingly, the cilia appear to penetrate the RPE layer alone as no CPs  
227 were detected within the RPE pocket prior to the formation of OS  
228 discs (Fig. 3C and Fig. S1C).

229 To obtain further detail about F-actin distribution during pho-  
230 toreceptor development, we performed confocal imaging of ze-  
231 brafish ocular cryosections stained with phalloidin. *Tg(sws1:GFP)*  
232 embryos were selected for sectioning because UVS cones are the  
233 earliest forming photoreceptors within the zebrafish retina and the  
234 transgene provides clear visualization of the cells (Crespo and  
235 Knust, 2018). As expected, different morphological stages were  
236 observable within a single section due to the wave-like devel-  
237 opment of photoreceptors over time across the retina (Raymond  
238 et al., 1995). For consistency, we analyzed only the dorsocen-  
239 tral retina in Fig. 3D–J. At 64 hpf, very few ISs were observed  
240 and most photoreceptors, including UVS cones, featured a flat,  
241 actin-rich apical domain (Fig. 3D). A broad expansion of the IS  
242 occurred around 66 hpf, with mitochondria beginning to cluster  
243 apically, as indicated by the region of weak GFP signal (Fig. 3E).  
244 The nascent IS also featured F-actin extending above the OLM in  
245 a dome-like shape (Fig. 3E, arrowheads) and filopodia-like pro-  
246 jections emerging from the apical surface of some photoreceptors  
247 (Fig. 3E', arrowhead). At 68 hpf, further IS elongation occurs and a  
248 mitochondrial cluster is clearly delineated (Fig. 3F', arrow). Some  
249 photoreceptors at this stage retain the rounded apical surface of the  
250 IS (Fig. 3F, arrow), while others have now assumed a rectangu-  
251 lar shape (Fig. 3F, arrowhead). Faintly stained vertical projections  
252 sprouting from the IS actin dome are observed in many cells. We  
253 expect that most cells have developed a small OS or at least a cil-  
254 ium by 68 hpf; however, this was difficult to observe, likely owing  
255 to interference by the pigment of the adjacent RPE pocket. In the  
256 72 hpf retina, further IS elongation has occurred and short actin-  
257 filled processes surrounded a well-formed UVS OS, now visible  
258 (Fig. 3G, arrowhead). By 96 hpf, photoreceptors exhibit further  
259 OS and CP growth, as well as changes to synaptic morphology  
260 (Fig. 3H).

261 CPs undergo an initial growth phase between 68 and 72 hpf. To  
262 better understand the transition from precursors to CPs in zebrafish  
263 embryos, we analyzed the localization of espin (USH1M), an actin  
264 bundling protein associated with microvillar growth in other cell  
265 types (Desban et al., 2019). At 67 hpf, espin is weakly expressed  
266 within the IS actin dome, above the OLM (Fig. 3I). Remarkably,  
267 espin strongly localizes to the nascent processes, suggesting an ac-  
268 tive bundling phase coinciding with CP growth (Fig. 3J and Fig.  
269 S2C).

270 CPs accompany the OS from an early stage, yet are not associ-  
271 ated with the nascent cilium. Remarkably, photoreceptor microvilli

exist prior to the cilium or OS appearing, and the IS actin dome  
precedes OS formation and serves as a base for CP sprouting.

### Tangential processes persist during photoreceptor differentiation

276 When analyzing photoreceptor development prior to OS forma-  
277 tion, we captured apical processes of diverse morphology —  
278 tangential processes on the progenitors and vertical processes atop  
279 the nascent ISs. To identify whether the two represent different  
280 stages of a single structure or develop individually, we applied mo-  
281 saic labeling obtained by injecting a DNA construct driving the  
282 expression of a membrane form of GFP under the *crx* promoter  
283 region (*crx:EGFP-CAAX*), highlighting the external shape of iso-  
284 lated cells. At the periphery of the cell differentiation area in 72 hpf  
285 embryo retinas, photoreceptors and progenitors at different stages  
286 can be found. For example, some cells exhibit the typical shape  
287 of early photoreceptor progenitors, with a rounded cell body (i.e.,  
288 has not yet elongated along the apical-basal axis) and a profusion  
289 of thin cellular processes extending radially from the edges of the  
290 apical cell surface (Fig. 4A, Movie S1). These processes have been  
291 previously described at earlier developmental stages as "tangential  
292 processes" (Aparicio et al., 2021) and they are characterized by  
293 highly dynamic behavior, evident upon time-lapse observation of  
294 GFP-positive cells at the periphery of 60–72 hpf retinas (Fig. 4B,  
295 Movie S2).

296 Around the same region, other cells with *crx* promoter-driven  
297 GFP expression have already acquired an apico-basally elongated  
298 conformation, indicating they are post-mitotic differentiating pho-  
299 toreceptors (Fig. 4C,D). Interestingly, we observed *zpr1* antibody-  
300 labeled cells, just at the onset of IS formation and still harboring  
301 relatively long tangential processes (Fig. 4C). Other photorecep-  
302 tors, more advanced in the differentiation process and showing an  
303 evident forming IS, display many cell processes extending from  
304 their apical portion, albeit shorter than at earlier stages (Fig. 4D).  
305 Some of these processes originate from the interphase between the  
306 cell body and the IS, at the level of the OLM, at the same position  
307 and direction as earlier tangential processes. Some others, how-  
308 ever, originate from the apical dome above the OLM and extend in  
309 various directions. The tangential processes are lost in subsequent  
310 stages, as evident from images of the *Tg(sws1:GFP)* transgenic  
311 line in Fig. 3. Cells with ISs and tangential processes are visible  
312 in the dorsocentral retina at 66 hpf (Fig. 3E'), but the tangential  
313 processes are absent by the time the OS has formed at 72 hpf  
314 (Fig. 3G'). Movie S3 and Fig. S3 document the transition away  
315 from long, dynamic tangential processes as photoreceptors mature  
316 and begin to form specialized apical regions.

317 In summary, we discovered a brief period of overlap between  
318 tangential processes and the onset of CP formation, coinciding  
319 with the emergence of the IS. While tangential processes briefly  
320 coexist with CPs on developing photoreceptors, the two types of  
321 actin-based cellular protrusions are dynamically and morphologi-  
322 cally distinct.

### CPs feature a dynamic actin core

324 Intestinal brush border microvilli exhibit rapid actin recycling  
325 through growth of the filaments at the microvillar tips and dis-  
326 assembly inside the cell body, a process known as treadmilling  
327 (Meenderink et al., 2019). On the other hand, hair cell stereocilia  
328 in the ear feature only tip turnover, with the shaft remaining stable



329 for months (Zhang et al., 2012; Narayanan et al., 2015; Drum-  
330 mond et al., 2015). To determine which type of actin dynamics  
331 is characteristic for CPs, we used Tol2 transgenesis to create fish  
332 carrying a random insertion containing the heat shock promoter  
333 *hsp70l*, zebrafish *actb1* cDNA, and a myc tag (Fig. 5A). The con-  
334 struct included a *cmhc2:EGFP* transgenesis marker to drive GFP  
335 expression in the heart and allow for selection of positive embryos.  
336 24 hours after heat shock, the fish were euthanized and processed  
337 for microscopy. In 6 dpf (days post fertilization) injected larvae  
338 featuring mosaic myc expression, newly introduced tagged actin  
339 was observed at the OPL (weak expression) and in CPs and their  
340 roots, with particularly strong expression in the latter (Fig. S2E).  
341 The OLM was almost entirely devoid of tagged actin, although  
342 strongly stained by phalloidin. No positive cells were detected  
343 in the control zebrafish. For further analysis, a stable transgenic  
344 line was generated (referred to as *Tg(hsp:act-myc)*). Only a few  
345 photoreceptors with low baseline actin-myc expression were oc-  
346 casionally observed in control zebrafish at 1 mpf (Fig. 5B). In  
347 contrast, all zebrafish in the heat shock group had strong actin-myc  
348 expression in the majority of cone photoreceptors (Fig. 5C). The  
349 localization of tagged actin in cones of the juvenile fish was simi-  
350 lar to that observed in injected larvae: absent at the OLM, diffuse  
351 in the synaptic layer and the IS, and highly concentrated in CPs  
352 and CP roots (Fig. 5D,D'). Occasionally, a rod IS not entirely con-  
353 cealed by the RPE was detected, always myc-positive (Fig. 5D',  
354 arrow).

355 To determine actin dynamics while CPs are extending along-  
356 side the growing OSs, 3 dpf *Tg(hsp:act-myc)* embryos were eu-  
357 thanized 6 hours after heat shock. Again, only a few positive  
358 cells were detected in control eyes (Fig. S2F). In the heat shock  
359 group, the photoreceptor layer exhibited strong actin-myc expres-  
360 sion (Fig. 5E,E'). Compared to 1 mpf photoreceptors, there was  
361 stronger myc labeling at the OPL, and an occasional weak signal  
362 at the OLM was observed. Both CPs and the roots featured high  
363 actin-myc incorporation, in contrast to espin localizing mostly to  
364 CPs at this stage (Fig. 3J). Also of note, actin-myc could be ob-  
365 served throughout the IS actin dome of immature photoreceptors  
366 in the peripheral retina.

367 Despite maintaining a consistent length during retinomotor  
368 movements, actin cores of photoreceptor microvilli and their IS  
369 roots undergo constant incorporation of new actin monomers in  
370 both embryonic and juvenile fish.

### 371 Complexity of structures organizing the OS layer

372 Photoreceptor OSs are encased in a supportive environment that  
373 includes CPs, a complex interphotoreceptor matrix, and extensive  
374 RPE villous protrusions (Ishikawa et al., 2015; Steinberg et al.,  
375 1977). Less recognized are processes extended by Müller glial  
376 cells. Above the OLM, Müller glia extend microvilli and, at least  
377 in zebrafish, also longer, thicker apical processes that reach UVS  
378 cone OSs (Zou et al., 2012). Given that glial and RPE processes  
379 protrude into the relatively constricted space between the bulky  
380 photoreceptor OSs, the possibility arises that they not only inter-  
381 act with the photoreceptors, but also with each other. To visualize  
382 the positioning and complexity of these support arrangements, we  
383 labeled retinal sections from 1 mpf *Tg(gfap:GFP)* zebrafish, in  
384 which Müller glia express GFP and the full cell morphology can  
385 be well visualized. The long apical glial protrusions colocalized  
386 with phalloidin staining of thick actin bundles and extended along-  
387 side UVS cone OSs all the way to the tips (Fig. 6A, arrowhead

and Fig. S2D). Incredibly, the apical glial processes overlapped,  
in very close proximity, with the RPE villi visualized by *zpr2* an-  
tibody and descending towards the OLM (Fig. 6A,C) (Hanovice  
et al., 2019). In a tangential view, the phalloidin-stained thick actin  
bundles within the long glial processes are visible surrounding the  
UVS cone OSs, at a ratio of five glial processes per OS. Further,  
the actin bundles are adjacent to rod ISs, together forming a regular  
pattern as part of the zebrafish photoreceptor mosaic (Fig. 6B,D).  
Notably, Müller glial apical processes do not protrude beyond the  
OLM in 3 dpf embryonic retina (Fig. S2G), and therefore do not  
accompany the emerging OS.

Müller glia and RPE represent the two main cell types support-  
ing the homeostasis of photoreceptors. We demonstrate that their  
apical protrusions overlap to create a unique encapsulation of UVS  
cone OSs.

### DISCUSSION

While CPs remain poorly understood, a possible association with  
the retinal USH1 phenotype brought them to attention as a poten-  
tially critical aspect of photoreceptor biology (Sahly et al., 2012;  
Schietroma et al., 2017; Miles et al., 2021). As zebrafish is a  
favourable model for photoreceptor disease studies (Noel et al.,  
2022), our detailed examination of CP characteristics in wildtype  
zebrafish will provide a useful reference for future investigation.  
Most notably, we characterized the transition from dynamic tan-  
gential processes to vertical CPs just prior to OS formation, as well  
as how CPs undergo continuous turnover of their actin cores while  
maintaining constant lengths.

### Assessment of zebrafish CP parameters

We characterized basic parameters of CPs in zebrafish using con-  
focal microscopy and TEM. While images of zebrafish CPs were  
previously shown in a TEM analysis of photoreceptors (Tarboush  
et al., 2012) and in the context of the *pcdh15b* mutation (Miles  
et al., 2021), our data provide a quantitative and detailed assess-  
ment of CPs in relation to the various photoreceptor subtypes.  
Comparing our findings to green sunfish, another teleost species  
where data is available, zebrafish CPs are in the same length  
range (3–6  $\mu\text{m}$  vs 5  $\mu\text{m}$  in green sunfish) but fewer in number  
(12–14 in zebrafish blue cones vs 23–26 in green sunfish sin-  
gle cones) (Nagle et al., 1986). When considering mammalian  
species with quantification data available, the number of CPs ex-  
tended by zebrafish blue cones is comparable to that of macaque  
cones (14–16) (Sahly et al., 2012). In addition, macaque cone CP  
length is similar to our measurements in zebrafish double cones  
(3  $\mu\text{m}$ ), though diameter is larger (244 nm vs 150 nm in zebrafish).  
Notably, zebrafish CPs are longer than intestinal microvilli (1–  
3  $\mu\text{m}$ ), but similar to renal microvilli (3–5  $\mu\text{m}$ ) and the microvilli of  
cerebrospinal fluid-contacting neurons (3–4  $\mu\text{m}$ ) (Sharkova et al.,  
2022). As reported for other species (Sahly et al., 2012; Schi-  
etroma et al., 2017), we observed substantial differences in basic  
parameters between photoreceptor subtypes, not only between  
rods and cones, but also between short and long cones.

The most surprising finding in analysis of CP length was the  
 $\approx 70\text{--}80\%$  coverage of blue and UVS cone OSs given that CPs  
are always described as encircling the base of the OS. Of note,  
blue and UVS cone OSs are closest to the OLM and most distant  
from the RPE. It is plausible that the extended CPs compensate for  
diminished support from apical RPE processes and help guide the  
translocating OS lamellae.



446 Still, RPE villi do extend alongside the UVS OS and feature 504  
447 extensive overlap with Müller glial apical protrusions. This implies 505  
448 a special regulation of UVS OS dynamics and a potential 506  
449 direct interaction between the RPE and Müller glia. While the two 507  
450 cell types are both well characterized as supportive of photoreceptor 508  
451 function, they are typically portrayed as physically separate in 509  
452 the literature. Indeed, we found only one reference, from 1964, of 510  
453 contact between RPE and Müller glial processes in the bullfrog, 511  
454 *Rana pipiens* (Nilsson, 1964a). Better acknowledged is evidence 512  
455 of RPE-derived factors being necessary for the proper functioning 513  
456 of the Müller glia (Jablonski et al., 2001). RPE signaling was 514  
457 also demonstrated to induce Müller glia proliferation both in vitro 515  
458 (Jaynes and Turner, 1995; Goczałik et al., 2005) and in vivo (Webster 516  
459 et al., 2019). Contacts between glia and RPE processes could 517  
460 play an important role in maintaining photoreceptor health and 518  
461 function, and may have been overlooked in other species.  
462 Retinomotor movements are a feature of teleost and amphibian 519  
463 retinas and we examined whether the contraction/elongation of 520  
464 the ISs was associated with changes in CP length. Surprisingly, we 521  
465 detected no difference in CP length between light and dark conditions. 522  
466 Having confirmed that retinomotor movements occur by this point (1 mpf) 523  
467 (Hodel et al., 2006), we therefore expect CPs to maintain constant 524  
468 length in older fish as well. Notably, our results differ from previous 525  
469 experiments on green sunfish showing light-induced contraction of rod 526  
470 CPs occurring alongside elongation of ISs (Pagh-Roehl et al., 1992). This 527  
471 may be a species difference, although only rods were examined in the 528  
472 sunfish. Interestingly, retinomotor movements are not an entirely 529  
473 actin-driven process, as microtubule translocation plays a role at least 530  
474 in the elongation of cone myoids, suggesting a mechanism for decoupling 531  
475 CPs from IS movements (Lewis et al., 2018; Burnside, 1976). Microtubules 532  
476 are abundant in both rod and cone ISs (Verschuere et al., 2022).  
477 Of note, there are contrasting views regarding UVS cone participation 533  
478 in retinomotor movements (Menger et al., 2005; Neuhaus, 2010). Our 534  
479 data support the idea that UVS cone ISs change length upon light 535  
480 adaptation, albeit to a lesser extent than those of rods and double 536  
481 cones. Interestingly, retinomotor movements are also not equal across 537  
482 all cells. For example, light-adapted shortened rods are divided into 538  
483 two rows (also previously described in (Pagh-Roehl et al., 1992)), and 539  
484 the dark-adapted UVS cone row features isolated individual cells that 540  
485 are noticeably longer than the majority.  
486  
487  
488 **CP development: before and after the OS** 541  
489 Neuroepithelial progenitors undergo considerable morphological 542  
490 change during their development into photoreceptors. Our goal here 543  
491 was to learn more about how CPs fit into the context of photoreceptor 544  
492 maturation.  
493 Several papers described the presence of processes atop the 545  
494 IS prior to OS emergence. In scanning electron microscopy images of 546  
495 *Xenopus* photoreceptors, the developing CPs appeared on the apical 547  
496 surface of the IS (Sahly et al., 2012). Initially immature, they change 548  
497 their morphology after OS emergence. Similarly, two papers examining 549  
498 chick retina showed abundant microvilli emerging from the “ball-like” 550  
499 ISs as they bulged above the OLM (Olson, 1979; Wai et al., 2006). The 551  
500 microvilli protruded both vertically and laterally, without any overt 552  
501 organization. Previous work also showed the presence of very dynamic 553  
502 filopodia-like tangential processes emerging from the edges of the 554  
503 apical surface of differentiating zebrafish photoreceptors, though well 555  
504 before IS expansion (Aparicio et al., 2021). Here, we observed the 556  
505 presence of both vertical (CP precursors) and lateral (tangential) 557  
506 processes prior to OS formation. While the IS expands, tangential 558  
507 processes undergo retraction and CPs emerge, and we observed a brief 559  
508 period of processes extending in multiple directions, suggesting a 560  
509 dramatic change in actin dynamics at the apical cell surface. Further, 561  
510 a primary cilium is present on the apical surface during the transition 562  
511 from neuroepithelial cell to photoreceptor, but appears to be retracted 563  
512 before newly emerging as the nascent OS (Aparicio et al., 2021). 564  
513 Importantly, we observed that CPs, while present, do not abut the 565  
514 newly formed cilium. Instead, the cilium is fully encased within the 566  
515 RPE, and contact with CPs only begins once the first discs are 567  
516 formed.  
517 The apical dome formation just prior to OS and CP emergence 568  
518 was demonstrated previously for chick and zebrafish photoreceptors 569  
519 (Olson, 1979; Wai et al., 2006; Crespo and Knust, 2018). A similar 570  
520 structure has not been described for maturing renal epithelial cells, 571  
521 cerebrospinal fluid-contacting neurons, or inner ear hair cells just 572  
522 prior to microvilli formation and therefore the actin dome is likely 573  
523 related more to IS maturation or OS formation than to CP emergence 574  
524 (Desban et al., 2019; Barr-Gillespie, 2015; Gaeta et al., 2021). 575  
525 Indeed, the clustering of mitochondria in the apical portion of the 576  
526 cell is an early indicator of the specialization of the apical 577  
527 photoreceptor region and occurs concomitantly with the formation of 578  
528 the actin-lined dome. The IS subsequently transitions from a dome 579  
529 shape to a cylindrical shape as the OS begins to form discs and 580  
530 becomes encircled by CPs.  
531 Differentiating cerebrospinal fluid-contacting neurons adopt a 581  
532 circumferential apical actin ring from which grow the actin bundles 582  
533 giving rise to the microvillar cores (Desban et al., 2019). Photoreceptors 583  
534 have a similar actin ring at the OLM, which is maintained from the 584  
535 junctions between neighboring neuroepithelial cells (Spitznas, 1970). 585  
536 The actin lining the apical dome is anchored at the OLM, as are the 586  
537 roots for the nascent CPs. Notably, F-actin remains at the IS/OS 587  
538 junction of mature photoreceptors, visible as a line immediately 588  
539 above the mitochondrial cluster.  
540 Our data align with previous findings showing that photoreceptor 589  
541 microvilli change form over the course of development, as illustrated 590  
542 by Fig. 7; however, we discovered a surprising and distinct transition 591  
543 from tangential, dynamic filopodia to vertical, static microvilli. 592  
544  
545  
546 **Implications of dynamic CPs** 593  
547 In this paper, we provide insight into actin dynamics of photoreceptors. 594  
548 CPs and their IS roots feature fast incorporation of new actin monomers, 595  
549 whereas actin associated with the cell-cell junctions at the OLM and in 596  
550 the OPL synapses are relatively stable in juvenile zebrafish. There was 597  
551 no visible difference in localization of induced actin between cone 598  
552 subtypes. In the developing 3 dpf retina, both the CP cores and the 599  
553 IS actin dome appear highly dynamic, as anticipated based on the rapid 600  
554 morphological changes we observed in those structures. The synapses 601  
555 also demonstrate a high expression of induced actin, possibly coinciding 602  
556 with their maturation (Schmitt and Dowling, 1999). On the other hand, 603  
557 the OLM is stable at 3 dpf, showing limited incorporation of new actin. 604  
558 The speed of microvillar actin turnover varies depending on the type 605  
559 of cell, with two models being particularly well-researched: rapid 606  
560 treadmilling in brush border microvilli (Loomis et al., 2003) and tip 607  
561 turnover on a stable shaft in stereocilia (Zhang et al., 2012; 608  
562

|     |                                                                                           |                                                                               |     |
|-----|-------------------------------------------------------------------------------------------|-------------------------------------------------------------------------------|-----|
| 563 | Narayanan et al., 2015; Drummond et al., 2015). Stereocilia are                           | actin incorporation after heat shock ( <i>Tg(hsp:act-myc)</i> , see details   | 621 |
| 564 | neuronal microvilli and share a set of basic actin cross-linkers                          | below).                                                                       | 622 |
| 565 | with photoreceptor CPs ( <i>espin</i> , <i>fascin</i> , and <i>fimbrin/plastin</i> ), and |                                                                               |     |
| 566 | the processes were reported to express the Usher complex proteins                         |                                                                               |     |
| 567 | known to create links between the stereocilia (Sahly et al., 2012;                        | <b>Light adaptation setup</b>                                                 | 623 |
| 568 | Lin-Jones and Burnside, 2007; Höfer and Drenckhahn, 1993; Mc-                             | For experiments with LA vs DA comparison, DA zebrafish were                   | 624 |
| 569 | Grath et al., 2017; Schietroma et al., 2017; Verschueren et al.,                          | kept in the dark overnight + 1 hour. The other group was LA for               | 625 |
| 570 | 2022). However, stereocilia have a mechanosensory role supported                          | 1 hour, and both groups were euthanized at the same time in the               | 626 |
| 571 | by thick actin bundles and a unique staircase arrangement (Tilney                         | morning. The DA fish were handled under dim red light.                        | 627 |
| 572 | et al., 1980). Indeed, despite the Usher-inspired comparison of CPs                       |                                                                               |     |
| 573 | to stereocilia, the former exhibit actin dynamics resembling the                          |                                                                               |     |
| 574 | brush border.                                                                             |                                                                               |     |
| 575 | Treadmilling involves the addition of actin monomers to the                               | <b>Tissue preparation and immunostaining</b>                                  | 628 |
| 576 | F-actin plus ends at the microvillar tips and removal from the                            | Whole euthanized zebrafish were fixed with 4% paraformaldehyde                | 629 |
| 577 | cytosolic minus ends. Using our heat shock system, we showed                              | (PFA) in phosphate-buffered saline (PBS) overnight at 4°C. The                | 630 |
| 578 | rapid turnover in CPs but could not elucidate the exact pattern of                        | fixative was washed out with PBS in three washing steps. After-               | 631 |
| 579 | actin monomer addition and removal. However, the actin bundle in                          | wards, a 17.5% sucrose solution was added until the fish sank                 | 632 |
| 580 | CPs is reportedly oriented as in other microvilli, with the plus ends                     | (from ≈1 hour for 3 dpf embryos to 1 day for 1 mpf juveniles).                | 633 |
| 581 | at the distal tip, suggesting a similar mechanism of actin renewal                        | They were then left in 35% sucrose at 4°C overnight. Next, the fish           | 634 |
| 582 | (O'Connor and Burnside, 1981; Pagh-Roehl et al., 1992).                                   | were oriented in plastic cryomolds filled with optimal cutting tem-           | 635 |
| 583 | Our data shows that CPs maintain a constant length despite con-                           | perature compound (Tissue-Tek, Sakura Finetek). The blocks were               | 636 |
| 584 | tinual renewal of their actin cores. The consistency of CP length                         | frozen on dry ice and stored at -80°C until sectioning. 12 μm sec-            | 637 |
| 585 | and OS coverage within each photoreceptor subtype but dispar-                             | tions were cut with the Thermofisher Shandon E, Leica CM1520,                 | 638 |
| 586 | ity between subtypes suggests careful regulation of CP growth.                            | or Leica CM1900 cryostat. The sections were transferred onto                  | 639 |
| 587 | However, we do not yet understand the function of CPs or the                              | Superfrost Plus slides (Fisherbrand) and kept at -20°C.                       | 640 |
| 588 | importance of precise length control. One proposed CP function                            | After warming up the slide for 5 minutes, the tissue area was                 | 641 |
| 589 | is to restrain growth of nascent discs at the basal OS. Indeed,                           | outlined with a lipid pen, followed by a short rinse with PBS.                | 642 |
| 590 | overgrowth of photoreceptor discs was observed when proposed                              | Next, the sections were permeabilized with PDT (0.1% Triton X-                | 643 |
| 591 | CP-OS linker proteins, <i>Pchd15</i> or <i>Cdh23</i> , were reduced or ab-                | 100, 1% dimethyl sulfoxide in PBS). The sections were blocked                 | 644 |
| 592 | scent (Miles et al., 2021; Schietroma et al., 2017). Alternative CP                       | for 1 hour with 5% goat or donkey serum in PDT (depending                     | 645 |
| 593 | functions could be to provide general structural support for the                          | on the secondary antibody type) and subsequently incubated with               | 646 |
| 594 | OS, possibly in conjunction with surrounding tissues, or transport                        | primary antibodies diluted in blocking solution at 4°C overnight.             | 647 |
| 595 | metabolites to the OS, bypassing the connecting cilium. Despite                           | Next, secondary antibodies and conjugated phalloidin diluted in               | 648 |
| 596 | being discovered more than 150 years ago and residing adjacent                            | blocking solution were added for 1 hour at room temperature.                  | 649 |
| 597 | to the cellular compartment where vision begins, CPs remain a                             | All antibodies and conjugated dyes are listed in Table S1. After              | 650 |
| 598 | mystery. Further research is necessary to uncover their role in                           | washing, the slides were mounted with mowiol-based homemade                   | 651 |
| 599 | photoreceptor biology.                                                                    | mounting medium (pH=8.5, RI≈1.51, 2.5% DABCO), coated with                    | 652 |
|     |                                                                                           | coverslips, and kept at 4°C.                                                  | 653 |
|     |                                                                                           | For visualization of tangential processes, embryos were grown                 | 654 |
|     |                                                                                           | in 0.003% phenylthiourea (PTU, Sigma), fixed overnight at 4°C by              | 655 |
|     |                                                                                           | immersion in 4% paraformaldehyde in phosphate buffer saline, pH               | 656 |
|     |                                                                                           | 7.4 (PFA-PBS). For whole-mount immunostaining, all subsequent                 | 657 |
|     |                                                                                           | washes were performed in PBS containing 1% Triton X-100.                      | 658 |
| 600 | <b>MATERIALS AND METHODS</b>                                                              |                                                                               |     |
| 601 | <b>Zebrafish husbandry</b>                                                                | <b>Generating <i>Tg(hsp:act-myc)</i> line</b>                                 | 659 |
| 602 | Zebrafish were handled at the University of Alberta aquatic fa-                           | To generate <i>Tg(hsp:act-myc)</i> zebrafish, we followed the Tol2kit         | 660 |
| 603 | ilities according to standard protocols and with ethics protocol                          | protocol combining Gateway recombination technology and Tol2                  | 661 |
| 604 | approved by Animal Care and Use Committee (AUP1476) and at                                | transposon-based incorporation (Kwan et al., 2007). To ob-                    | 662 |
| 605 | the Zebrafish Laboratory, Institut Pasteur de Montevideo, follow-                         | tain zebrafish actin ( <i>zact</i> ) cDNA (transcript <i>actb1-201</i> , ENS- | 663 |
| 606 | ing the approved local regulations (CEUA-IPMon, and CNEA).                                | DART00000054987.7), mRNA was isolated from 3 dpf TL em-                       | 664 |
| 607 | Embryos were collected from a breeding and raised in embryo                               | bryos (RNeasy, Qiagen; RNAlater, Invitrogen), and AffinityScript              | 665 |
| 608 | medium (1x E2, Zebrafish International Resource Center (ZIRC))                            | QPCR cDNA Synthesis Kit (Agilent Technologies) with a set                     | 666 |
| 609 | at 28.5°C with a 14/10 hours light/dark cycle. At 5–6 dpf, larvae                         | of specific primers (F: CCATGGATGAGGAAATCGCTG; R:                             | 667 |
| 610 | were transferred to the aquatic facility. Zebrafish were euthanized                       | AGAAGCACTTCCTGTGGACGATG) was applied. All primers                             | 668 |
| 611 | using an overdose of methanesulfonate salt (Acros Organics, pH                            | were ordered from Integrated DNA Technologies as 25 nmole                     | 669 |
| 612 | adjusted to 7.0).                                                                         | oligos with standard desalting purification. For higher yield, we             | 670 |
| 613 | TL and AB zebrafish were used as wild-types, with only one                                | cloned the <i>zact</i> sequence into the bacterial plasmid pCR 2.1            | 671 |
| 614 | line used throughout an experiment. <i>Crystal</i> zebrafish lacking pig-                 | (TOPO TA cloning kit with One Shot TOP10 chemically com-                      | 672 |
| 615 | ment in the eye and the body was generated in the laboratory of                           | petent cells, Invitrogen). TOP10 chemically competent cells were              | 673 |
| 616 | Dr. Ted Allison based on the previously described <i>crystal</i> line                     | also used in other steps.                                                     | 674 |
| 617 | (Antinucci and Hindges, 2016; Balay, 2018). Transgenic strains                            |                                                                               |     |
| 618 | were used to examine UV cones ( <i>Tg(sws1:GFP)</i> , (Takechi et al.,                    |                                                                               |     |
| 619 | 2003)), rods ( <i>Tg(rho:eGFP)</i> , (Hamaoka et al., 2002)), Müller glia                 |                                                                               |     |
| 620 | ( <i>Tg(gfap:GFP)</i> , (Bernardos and Raymond, 2006)), and tagged                        |                                                                               |     |

|     |                                                                                                                                                                                                      |     |
|-----|------------------------------------------------------------------------------------------------------------------------------------------------------------------------------------------------------|-----|
| 675 | Next, zact sequence was amplified with primers containing                                                                                                                                            |     |
| 676 | attB sites (F: GGGGACAAGTTTGTACAAAAAAGCAGGCTC-                                                                                                                                                       |     |
| 677 | CATGGATGAGGAAATCGCTG; R: GGGGACCACTTTGTACA-                                                                                                                                                          |     |
| 678 | AGAAAGCTGGGTAGAAGCACTTCCTGTGGACGATG) using                                                                                                                                                           |     |
| 679 | a high-fidelity polymerase (Phusion, NEB). To create a middle                                                                                                                                        |     |
| 680 | entry clone pME-zact, we performed a BP reaction cloning attB-zact                                                                                                                                   |     |
| 681 | product into a donor vector pDONR221 (BP Clonase II, Invitro-                                                                                                                                        |     |
| 682 | gen, 11789020). The subsequent LR reaction (LR Clonase II, In-                                                                                                                                       |     |
| 683 | vitrogen, 11791) combined three entry clones and one destination                                                                                                                                     |     |
| 684 | vector (p5E- <i>hsp70l</i> + pME-zact + p3E-MTpA + pDestTol2CG2)                                                                                                                                     |     |
| 685 | into one construct (pDestTol2CG2; <i>hsp70l</i> :zact-MTpA).                                                                                                                                         |     |
| 686 | On the morning of injection, Tol2 mRNA and the construct (fi-                                                                                                                                        |     |
| 687 | nal concentration 25 ng/μL each) were combined and 1 nL of the                                                                                                                                       |     |
| 688 | mixture was injected into 1-cell stage TL embryos. Positive em-                                                                                                                                      |     |
| 689 | broys were selected at 1 dpf based on the presence of GFP signal                                                                                                                                     |     |
| 690 | in the heart. Injected fish were grown into adulthood and incrossed;                                                                                                                                 |     |
| 691 | positive embryos from this breeding were used in heat shock                                                                                                                                          |     |
| 692 | experiments. Additionally, a group of injected fish underwent pre-                                                                                                                                   |     |
| 693 | liminary heat shock experiments to confirm that myc-tagged actin                                                                                                                                     |     |
| 694 | is properly expressed after heat shock and to test various heat                                                                                                                                      |     |
| 695 | shock conditions.                                                                                                                                                                                    |     |
| 696 | <b>Generating <i>crx</i> mosaic embryos</b>                                                                                                                                                          |     |
| 697 | pDestTol2pA2;crx:EGFP-CAAX (Aparicio et al., 2021), together                                                                                                                                         |     |
| 698 | with Tol2 transposase mRNA were injected into the one-cell                                                                                                                                           |     |
| 699 | stage <i>roy</i> background (Ren et al., 2002) according to standard                                                                                                                                 |     |
| 700 | techniques.                                                                                                                                                                                          |     |
| 701 | <b>Heat shock</b>                                                                                                                                                                                    |     |
| 702 | 1 mpf juvenile zebrafish were transferred into a separate tank                                                                                                                                       |     |
| 703 | with a Hygger Titanium Aquarium Heater (HG-802, 50W), heat                                                                                                                                           |     |
| 704 | shocked at 39°C and euthanized 24 hours later. Embryos and lar-                                                                                                                                      |     |
| 705 | vae were subjected to 37°C in a water bath and euthanized 6                                                                                                                                          |     |
| 706 | hours after that. In both cases, the duration of the heat shock was                                                                                                                                  |     |
| 707 | 1 hour. Control zebrafish were transferred into a tank/tube with                                                                                                                                     |     |
| 708 | same parameters, but without heating.                                                                                                                                                                |     |
| 709 | <b>Fluorescent imaging and processing</b>                                                                                                                                                            |     |
| 710 | For the confocal imaging, Zeiss LSM510, LSM700 or LSM800                                                                                                                                             |     |
| 711 | microscopes were used with a 63x 1.4 NA oil objective. Zeiss                                                                                                                                         |     |
| 712 | Elyra 7 Lattice SIM was used to visualize fine detail of tagged                                                                                                                                      |     |
| 713 | actin incorporation presented in Figure 5(D,E). ZEN (2009, 5.5 &                                                                                                                                     |     |
| 714 | 3.0 black for Elyra), ImageJ (1.54f), and Imaris (9.8.2) were used                                                                                                                                   |     |
| 715 | to process the images.                                                                                                                                                                               |     |
| 716 | <b>TEM</b>                                                                                                                                                                                           |     |
| 717 | Zebrafish were fixed with a mixture containing 2.5% glutaralde-                                                                                                                                      |     |
| 718 | hyde and 2% PFA diluted in 0.1 M phosphate buffer. After three                                                                                                                                       |     |
| 719 | wash steps, the post-fixation was achieved with 1% osmium tetrox-                                                                                                                                    |     |
| 720 | ide to provide contrast for the sample. The fish were washed again,                                                                                                                                  |     |
| 721 | gradually dehydrated with ethanol, and infiltration with Spurr's                                                                                                                                     |     |
| 722 | resin was performed overnight. Next, they were embedded in flat                                                                                                                                      |     |
| 723 | molds containing fresh resin and left in the oven at 70°C overnight.                                                                                                                                 |     |
| 724 | The blocks were cut at the ultramicrotome into 70–90 nm sections                                                                                                                                     |     |
| 725 | that were stained with uranyl acetate and lead citrate.                                                                                                                                              |     |
| 726 | The images were acquired with the Philips/FEI (Morgagni)                                                                                                                                             |     |
| 727 | Transmission Electron Microscope with Gatan Camera operating                                                                                                                                         |     |
| 728 | at 80 kV. TEM images were processed in ImageJ (version 1.54f).                                                                                                                                       |     |
|     | <b>Time-lapse imaging</b>                                                                                                                                                                            | 729 |
|     | Embryos were selected at 50–60 hpf, anesthetized using 0.04                                                                                                                                          | 730 |
|     | mg/mL MS222 (Sigma), and mounted in 1% low melting-point                                                                                                                                             | 731 |
|     | agarose, containing 0.003% N-phenylthiourea and 0.04 mg/ml                                                                                                                                           | 732 |
|     | MS222/tricaine (Sigma) over n° 0 glass bottom dishes (MaTek).                                                                                                                                        | 733 |
|     | During overnight image acquisitions, embryos were kept in                                                                                                                                            | 734 |
|     | Ringer's solution (116 mM NaCl, 2.9 mM KCl, 1.8 mM CaCl <sub>2</sub> ,                                                                                                                               | 735 |
|     | 5 mM HEPES pH 7.2) with 0.04 mg/mL MS222. Live acquisi-                                                                                                                                              | 736 |
|     | tions were made using a Zeiss LSM 880 laser confocal microscope                                                                                                                                      | 737 |
|     | with a 40x 1.2 NA objective and glycerol:water (75:25) immersion                                                                                                                                     | 738 |
|     | medium. Stacks around 40 μm thick were acquired in bidirectional                                                                                                                                     | 739 |
|     | mode, at 1 μm spacing and 512 × 512 pixel resolution every 10                                                                                                                                        | 740 |
|     | min.                                                                                                                                                                                                 | 741 |
|     | <b>Image analysis</b>                                                                                                                                                                                | 742 |
|     | The sample size was calculated using the Boston University                                                                                                                                           | 743 |
|     | resources (URL: <a href="http://www.bu.edu/research/ethics-compliance/animal-subjects/animal-care/research/sample-size-calculations-iacuc/">www.bu.edu/research/ethics-compliance/animal-</a>        | 744 |
|     | <a href="http://www.bu.edu/research/ethics-compliance/animal-subjects/animal-care/research/sample-size-calculations-iacuc/">subjects/animal-care/research/sample-size-calculations-iacuc/</a> , last | 745 |
|     | accessed on 2024-02-26). To perform all statistical tests and to cre-                                                                                                                                | 746 |
|     | ate graphs, GraphPad Prism software (9.5.0) was used. CP number                                                                                                                                      | 747 |
|     | and the TEM data were assessed in one eye of the fish. For all other                                                                                                                                 | 748 |
|     | experiments, both eyes were analyzed and the average was calcu-                                                                                                                                      | 749 |
|     | lated to represent the fish. When comparing LA vs DA zebrafish,                                                                                                                                      | 750 |
|     | the images were blinded.                                                                                                                                                                             | 751 |
|     | <b>Footnotes</b>                                                                                                                                                                                     | 752 |
|     | <b>Acknowledgements</b>                                                                                                                                                                              | 753 |
|     | We acknowledge the employees of Health Sciences Laboratory Animal Services                                                                                                                           | 754 |
|     | and Science Animal Support Services, University of Alberta, and of the Zebrafish                                                                                                                     | 755 |
|     | Lab, Institut Pasteur de Montevideo, for their excellent fish care. We thank the Cell                                                                                                                | 756 |
|     | Imaging Core, U. Alberta, and Dr. Kiera Smith for Elyra access and training, the                                                                                                                     | 757 |
|     | Advanced Microscopy Facility, Dr. Kacie Norton for her help with the TEM sample                                                                                                                      | 758 |
|     | preparation and imaging, and the Advanced Bioimaging Unit at the Institut Pas-                                                                                                                       | 759 |
|     | teur Montevideo for their support and assistance with the confocal microscopes.                                                                                                                      | 760 |
|     | We thank Dr. Andrew Simmonds for providing mounting medium and access to                                                                                                                             | 761 |
|     | Imaris, Dr. Sarah Hughes for access to the LSM700 microscope, Dr. James Bar-                                                                                                                         | 762 |
|     | tles for sharing the espin antibody, Dr. Anastassia Voronova for access to the                                                                                                                       | 763 |
|     | ThermoFisher Shandon E cryostat, Dr. Qiumin Tan for access to the Leica CM1520                                                                                                                       | 764 |
|     | cryostat, Dr. Tom Hobman for the 9E10 anti-myc antibody, Dr. Ted Allison and Dr.                                                                                                                     | 765 |
|     | Paul Chrystal for sharing the Tol2kit plasmids and <i>crystal</i> zebrafish line, and Dr.                                                                                                            | 766 |
|     | Edan Foley for the Tol2 transposase mRNA. Many thanks to Dr. Paul Chrystal for                                                                                                                       | 767 |
|     | critically reading the manuscript.                                                                                                                                                                   | 768 |
|     | <b>Competing interests</b>                                                                                                                                                                           | 769 |
|     | The authors declare no competing or financial interests.                                                                                                                                             | 770 |
|     | <b>Funding</b>                                                                                                                                                                                       | 771 |
|     | This research was supported by the following funding sources: Natural Sciences                                                                                                                       | 772 |
|     | and Engineering Research Council of Canada (NSERC) Discovery Grant RGPIN-                                                                                                                            | 773 |
|     | 2018-05756 (JCH), Women and Children's Health Research Institute (WCHRI)                                                                                                                             | 774 |
|     | Innovation Grant #3684 (JCH), ANII-FCE grant #1_2021_1_166427 (FRZ), Pro-                                                                                                                            | 775 |
|     | grama de Desarrollo de las Ciencias Básicas (PEDECIBA, Uruguay) (FRZ, GA),                                                                                                                           | 776 |
|     | WCHRI Graduate Studentship (MS), Faculty of Medicine and Dentistry (University                                                                                                                       | 777 |
|     | of Alberta) 75th Anniversary Award, Delnor Scholarship, and Cook Family Endow-                                                                                                                       | 778 |
|     | ment Studentship (MS), FAU iMORE (Friedrich-Alexander University, Germany)                                                                                                                           | 779 |
|     | sponsored by Novartis (MS), NSERC Undergraduate Student Research Award                                                                                                                               | 780 |
|     | (CM).                                                                                                                                                                                                | 781 |
|     | <b>Data availability</b>                                                                                                                                                                             | 782 |
|     | All relevant data can be found within the article and its supplementary information                                                                                                                  | 783 |



## 784 Author contributions

785 Conceptualization: M.S., F.R.Z., J.C.H.; Methodology: M.S.,  
786 G.A., F.R.Z., J.C.H.; Formal analysis: M.S., G.A., F.R.Z., J.C.H.;  
787 Investigation: M.S., G.A., C.M.; Resources: J.C.H., F.R.Z.; Data  
788 curation: Writing - original draft: M.S., F.R.Z., J.C.H.; Writing -  
789 review and editing: M.S., F.R.Z., G.A., J.C.H.; Visualization: M.S.,  
790 G.A.; Supervision: F.R.Z., J.C.H.; Project administration: F.R.Z.,  
791 J.C.H.; Funding acquisition: F.R.Z., J.C.H.

## 792 BIBLIOGRAPHY

793 **Antinucci, P. and Hindges, R.** (2016). A crystal-clear zebrafish for in vivo  
794 imaging. *Scientific Reports* **6**(1). doi:10.1038/srep29490.  
795 **Aparicio, G., Rodao, M., Badano, J.L. and Zolessi, F.R.** (2021). Photoreceptor  
796 progenitor dynamics in the zebrafish embryo retina and its modulation by  
797 primary cilia and N-cadherin. *The International Journal of Developmental*  
798 *Biology* **65**(4-5-6), 439–455. doi:10.1387/ijdb.200113fz.  
799 **Balay, S.** (2018). Cryptochrome expression in the zebrafish retina: Potential  
800 implications for magnetoreception. Ph.D. thesis, University of Alberta,  
801 Edmonton, Canada. doi:10.13140/RG.2.2.10016.64008.  
802 **Barr-Gillespie, P.G.** (2015). Assembly of hair bundles, an amazing problem  
803 for cell biology. *Molecular Biology of the Cell* **26**(15), 2727–2732. doi:10.  
804 1091/mbc.e14-04-0940.  
805 **Bernardos, R.L. and Raymond, P.A.** (2006). GFAP transgenic zebrafish.  
806 *Gene Expression Patterns* **6**(8), 1007–1013. doi:10.1016/j.modgep.2006.04.  
807 006.  
808 **Burnside, B.** (1976). Microtubules and actin filaments in teleost visual cone  
809 elongation and contraction. *Journal of Supramolecular Structure* **5**(3), 257–  
810 275. doi:10.1002/jss.400050302.  
811 **Burnside, B. and Nagle, B.** (1983). Chapter 3 Retinomotor movements of  
812 photoreceptors and retinal pigment epithelium: Mechanisms and regulation.  
813 *Progress in Retinal Research* **2**, 67–109. doi:10.1016/0278-4327(83)  
814 90004-4.  
815 **Coudrier, E., Kerjaschki, D. and Louvard, D.** (1988). Cytoskeleton organiza-  
816 tion and submembranous interactions in intestinal and renal brush borders.  
817 *Kidney International* **34**(3), 309–320. doi:10.1038/ki.1988.183.  
818 **Crawley, S.W., Mooseker, M.S. and Tyska, M.J.** (2014). Shaping the intestinal  
819 brush border. *Journal of Cell Biology* **207**(4), 441–451. doi:10.1083/jcb.  
820 201407015.  
821 **Crespo, C. and Knust, E.** (2018). Characterisation of maturation of photore-  
822 ceptor cell subtypes during zebrafish retinal development. *Biology Open*  
823 doi:10.1242/bio.036632.  
824 **Desban, L., Prendergast, A., Roussel, J., Rosello, M., Geny, D., Wyart, C.**  
825 **and Bardet, P.L.** (2019). Regulation of the apical extension morphogenesis  
826 tunes the mechanosensory response of microvilliated neurons. *PLOS Biology*  
827 **17**(4), e3000235. doi:10.1371/journal.pbio.3000235.  
828 **Drummond, M.C., Barzik, M., Bird, J.E., Zhang, D.S., Lechene, C.P.,**  
829 **Corey, D.P., Cunningham, L.L. and Friedman, T.B.** (2015). Live-  
830 cell imaging of actin dynamics reveals mechanisms of stereocilia length  
831 regulation in the inner ear. *Nature Communications* **6**(1). doi:10.1038/  
832 ncomms7873.  
833 **El-Amraoui, A. and Petit, C.** (2014). The retinal phenotype of Usher syn-  
834 drome: Pathophysiological insights from animal models. *Comptes Rendus*  
835 *Biologies* **337**(3), 167–177. doi:10.1016/j.crv.2013.12.004.  
836 **Gaeta, I.M., Meenderink, L.M., Postema, M.M., Cencer, C.S. and Tyska,**  
837 **M.J.** (2021). Direct visualization of epithelial microvilli biogenesis. *Current*  
838 *Biology* **31**(12), 2561–2575. doi:10.1016/j.cub.2021.04.012.  
839 **Goczalik, I.M., Raap, M., Weick, M., Milenkovic, I., Heidmann, J., Enz-**  
840 **mann, V., Wiedemann, P., Reichenbach, A. and Francke, M.** (2005).  
841 The activation of IL-8 receptors in cultured guinea pig Müller glial cells  
842 is modified by signals from retinal pigment epithelium. *Journal of Neuroim-*  
843 *munology* **161**(1-2), 49–60. doi:10.1016/j.jneuroim.2004.12.004.  
844 **Goldberg, A.F.X., Moritz, O.L. and Williams, D.S.** (2016). Molecular basis  
845 for photoreceptor outer segment architecture. *Progress in Retinal and Eye*  
846 *Research* **55**, 52–81. doi:10.1016/j.preteyeres.2016.05.003.

**Hamaoka, T., Takechi, M., Chinen, A., Nishiwaki, Y. and Kawamura,** **S.** (2002). Visualization of rod photoreceptor development using GFP-  
transgenic zebrafish. *genesis* **34**(3), 215–220. doi:10.1002/gene.10155.  
**Hanovice, N.J., Leach, L.L., Slater, K., Gabriel, A.E., Romanovicz, D.,** **Shao,** **E.,** **Collery, R.,** **Burton, E.A.,** **Lathrop, K.L.,** **Link, B.A. et al.**  
(2019). Regeneration of the zebrafish retinal pigment epithelium after  
widespread genetic ablation. *PLOS Genetics* **15**(1), e1007939. doi:10.1371/  
journal.pgen.1007939.  
**Hodel, C., Neuhaus, S.C.F. and Biehler, O.** (2006). Time course and  
development of light adaptation processes in the outer zebrafish retina.  
*The Anatomical Record Part A: Discoveries in Molecular, Cellular, and*  
*Evolutionary Biology* **288A**(6), 653–662. doi:10.1002/ar.a.20329.  
**Höfer, D. and Drenckhahn, D.** (1993). Molecular heterogeneity of the actin  
filament cytoskeleton associated with microvilli of photoreceptors, Müller's  
glial cells and pigment epithelial cells of the retina. *Histochemistry* **99**(1),  
29–35. doi:10.1007/bf00268017.  
**Ishikawa, M., Sawada, Y. and Yoshitomi, T.** (2015). Structure and func-  
tion of the interphotoreceptor matrix surrounding retinal photoreceptor cells.  
*Experimental Eye Research* **133**, 3–18. doi:10.1016/j.exer.2015.02.017.  
**Jablonski, M.M., Tombran-Tink, J., Mrazek, D.A. and Iannaccone, A.**  
(2001). Pigment epithelium-derived factor supports normal Müller cell de-  
velopment and glutamine synthetase expression after removal of the retinal  
pigment epithelium. *Glia* **35**(1), 14–25. doi:10.1002/glia.1066.  
**Jaynes, C.D. and Turner, J.E.** (1995). Müller cell survival and proliferation  
in response to medium conditioned by the retinal pigment epithelium. *Brain*  
*Research* **678**(1-2), 55–64. doi:10.1016/0006-8993(95)00154-i.  
**Kwan, K.M., Fujimoto, E., Grabher, C., Mangum, B.D., Hardy, M.E.,** **Campbell,** **D.S.,** **Parant, J.M.,** **Yost, H.J.,** **Kanki, J.P. and Chien,** **C.B.**  
(2007). The Tol2kit: A multisite gateway-based construction kit for  
Tol2 transposon transgenesis constructs. *Developmental Dynamics* **236**(11),  
3088–3099. doi:10.1002/dvdy.21343.  
**Lewis, T.R., Zareba, M., Link, B.A. and Besharse, J.C.** (2018). Cone my-  
oid elongation involves unidirectional microtubule movement mediated by  
dynein-1. *Molecular Biology of the Cell* **29**(2), 180–190. doi:10.1091/mbc.  
e17-08-0525.  
**Lin-Jones, J. and Burnside, B.** (2007). Retina-specific protein Fascin 2 is an  
actin cross-linker associated with actin bundles in photoreceptor inner seg-  
ments and calycal processes. *Investigative Ophthalmology & Visual Science*  
**48**(3), 1380. doi:10.1167/iovs.06-0763.  
**Loomis, P.A., Zheng, L., Sekerková, G., Changyaleket, B., Mugnaini,** **E.** **and Bartles, J.R.** (2003). Espin cross-links cause the elongation of  
microvillus-type parallel actin bundles in vivo. *Journal of Cell Biology*  
**163**(5), 1045–1055. doi:10.1083/jcb.200309093.  
**McGrath, J., Roy, P. and Perrin, B.J.** (2017). Stereocilia morphogenesis  
and maintenance through regulation of actin stability. *Seminars in Cell &*  
*Developmental Biology* **65**, 88–95. doi:10.1016/j.semdb.2016.08.017.  
**Meenderink, L.M., Gaeta, I.M., Postema, M.M., Cencer, C.S., Chinowsky,** **C.R.,** **Krystofiak, E.S.,** **Millis, B.A. and Tyska, M.J.** (2019). Actin dynam-  
ics drive microvillar motility and clustering during brush border assembly.  
*Developmental Cell* **50**(5), 545–556. doi:10.1016/j.devcel.2019.07.008.  
**Menger, G.J., Koke, J.R. and Cahill, G.M.** (2005). Diurnal and circadian  
retinomotor movements in zebrafish. *Visual Neuroscience* **22**(2), 203–209.  
doi:10.1017/s0952523805222083.  
**Miles, A., Blair, C., Emili, A. and Tropepe, V.** (2021). Usher syndrome  
type 1-associated gene, *pcdh15b*, is required for photoreceptor structural  
integrity in zebrafish. *Disease Models & Mechanisms* **14**(12). doi:10.1242/  
dmm.048965.  
**Nagle, B.W., Okamoto, C., Taggart, B. and Burnside, B.** (1986). The teleost  
cone cytoskeleton. Localization of actin, microtubules, and intermediate  
filaments. *Investigative ophthalmology & visual science* **27**, 689–701.  
**Nambiar, R., McConnell, R.E. and Tyska, M.J.** (2010). Myosin mo-  
tor function: the ins and outs of actin-based membrane protrusions.  
*Cellular and Molecular Life Sciences* **67**(8), 1239–1254. doi:10.1007/  
s00018-009-0254-5.

- 911 Narayanan, P., Chatterton, P., Ikeda, A., Ikeda, S., Corey, D.P., Ervasti,  
912 J.M. and Perrin, B.J. (2015). Length regulation of mechanosensitive stere-  
913 ocilia depends on very slow actin dynamics and filament-severing proteins.  
914 *Nature Communications* **6**(1). doi:10.1038/ncomms7855.
- 915 Neuhauss, S.C.F. (2010). Zebrafish vision. In *Fish Physiology*, pages 81–122.  
916 Elsevier. doi:10.1016/s1546-5098(10)02903-1.
- 917 Nilsson, S.E.G. (1964a). An electron microscopic classification of the reti-  
918 nal receptors of the leopard frog (*Rana pipiens*). *Journal of Ultrastructure*  
919 *Research* **10**(5–6), 390–416. doi:10.1016/s0022-5320(64)80018-6.
- 920 Nilsson, S.E.G. (1964b). Receptor cell outer segment development and ul-  
921 trastructure of the disk membranes in the retina of the tadpole (*Rana*  
922 *pipiens*). *Journal of Ultrastructure Research* **11**(5–6), 581–620. doi:10.1016/  
923 s0022-5320(64)80084-8.
- 924 Noel, N.C.L., Allison, W.T., MacDonald, I.M. and Hocking, J.C. (2022). Ze-  
925 brafish and inherited photoreceptor disease: Models and insights. *Progress*  
926 *in Retinal and Eye Research* **91**, 101096. doi:10.1016/j.preteyeres.2022.  
927 101096.
- 928 O'Connor, P. and Burnside, B. (1981). Actin-dependent cell elongation in  
929 teleost retinal rods: requirement for actin filament assembly. *The Journal of*  
930 *Cell Biology* **89**(3), 517–524. doi:10.1083/jcb.89.3.517.
- 931 Olson, M.D. (1979). Scanning electron microscopy of developing photorecep-  
932 tors in the chick retina. *The Anatomical Record* **193**(3), 423–437. doi:10.  
933 1002/ar.1091930308.
- 934 Pagh-Roehl, K., Wang, E. and Burnside, B. (1992). Shortening of the caly-  
935 cal process actin cytoskeleton is correlated with myoid elongation  
936 in teleost rods. *Experimental Eye Research* **55**(5), 735–746. doi:10.1016/  
937 0014-4835(92)90178-u.
- 938 Raymond, P.A., Barthel, L.K. and Curran, G.A. (1995). Developmental pat-  
939 terning of rod and cone photoreceptors in embryonic zebrafish. *The Journal*  
940 *of Comparative Neurology* **359**(4), 537–550. doi:10.1002/cne.903590403.
- 941 Ren, J.Q., McCarthy, W.R., Zhang, H., Adolph, A.R. and Li, L. (2002). Be-  
942 havioral visual responses of wild-type and hypopigmented zebrafish. *Vision*  
943 *Research* **42**(3), 293–299. doi:10.1016/s0042-6989(01)00284-x.
- 944 Sahly, I., Dufour, E., Schietroma, C., Michel, V., Bahloul, A., Perfettini,  
945 I., Pepermans, E., Estivalet, A., Carette, D., Aghaie, A. et al. (2012).  
946 Localization of Usher 1 proteins to the photoreceptor calyceal processes,  
947 which are absent from mice. *Journal of Cell Biology* **199**(2), 381–399.  
948 doi:10.1083/jcb.201202012.
- 949 Schietroma, C., Parain, K., Estivalet, A., Aghaie, A., de Monvel, J.B., Pi-  
950 caud, S., Sahel, J.A., Perron, M., El-Amraoui, A. and Petit, C. (2017).  
951 Usher syndrome type 1-associated cadherins shape the photoreceptor outer  
952 segment. *Journal of Cell Biology* **216**(6), 1849–1864. doi:10.1083/jcb.  
953 201612030.
- 954 Schmitt, E.A. and Dowling, J.E. (1999). Early retinal development in  
955 the zebrafish, *Danio rerio*: Light and electron microscopic analyses. *The*  
956 *Journal of Comparative Neurology* **404**(4), 515–536. doi:10.1002/(sici)  
957 1096-9861(19990222)404:4<515::aid-cne8>3.0.co;2-a.
- 958 Schultze, M. (1872). XXVI The eye. I. The retina. In S. Stricker, ed., *Manual*  
959 *of human and comparative histology*, pages 218–298. London, The New  
960 Sydenham Society.
- 961 Sharkova, M., Chow, E., Erickson, T. and Hocking, J.C. (2022). The mor-  
962 phological and functional diversity of apical microvilli. *Journal of Anatomy*  
963 **242**(3), 327–353. doi:10.1111/joa.13781.
- 964 Spitznas, M. (1970). Zur Feinstruktur der sog. Membrana limitans externa  
965 der menschlichen Retina. *Albrecht von Graefes Archive for Clinical and*  
966 *Experimental Ophthalmology* **180**(1), 44–56. doi:10.1007/bf02384821.
- 967 Steinberg, R.H., Wood, I. and Hogan, M.J. (1977). Pigment epithelial  
968 ensheathment and phagocytosis of extrafoveal cones in human retina. *Philo-*  
969 *sophical transactions of the Royal Society of London. Series B, Biological*  
970 *sciences* **277**, 459–474. doi:10.1098/rstb.1977.0028.
- 971 Takechi, M., Hamaoka, T. and Kawamura, S. (2003). Fluorescence vi-  
972 sualization of ultraviolet-sensitive cone photoreceptor development in liv-  
973 ing zebrafish. *FEBS Letters* **553**(1–2), 90–94. doi:10.1016/s0014-5793(03)  
974 00977-3.
- 975 Tarboush, R., Chapman, G.B. and Connaughton, V.P. (2012). Ultrastructure  
976 of the distal retina of the adult zebrafish, *Danio rerio*. *Tissue and Cell* **44**(4),  
977 264–279. doi:10.1016/j.tice.2012.04.004.
- Tilney, L.G., Derosier, D.J. and Mulroy, M.J. (1980). The organization of  
978 actin filaments in the stereocilia of cochlear hair cells. *Journal of Cell*  
979 *Biology* **86**(1), 244–259. doi:10.1083/jcb.86.1.244.
- Tilney, L.G., Tilney, M.S. and DeRosier, D.J. (1992). Actin filaments, stere-  
980 ocilia, and hair cells: How cells count and measure. *Annual Review of Cell*  
981 *Biology* **8**(1), 257–274. doi:10.1146/annurev.cb.08.110192.001353.
- Verschueren, A., Boucherit, L., Ferrari, U., Fouquet, S., Nouvel-Jaillard,  
982 C., Paques, M., Picaud, S. and Sahel, J.A. (2022). Planar polar-  
983 ity in primate cone photoreceptors: a potential role in Stiles Craw-  
984 ford effect phototropism. *Communications Biology* **5**(1). doi:10.1038/  
985 s42003-021-02998-y.
- Volland, S., Hughes, L.C., Kong, C., Burgess, B.L., Linberg, K.A., Luna,  
986 G., Zhou, Z.H., Fisher, S.K. and Williams, D.S. (2015). Three-dimensional  
987 organization of nascent rod outer segment disk membranes. *Proceedings of*  
988 *the National Academy of Sciences* **112**(48), 14870–14875. doi:10.1073/pnas.  
989 1516309112.
- Wai, M.S.M., Lorke, D.E., Kung, L.S. and Yew, D.T.W. (2006). Morphogen-  
990 esis of the different types of photoreceptors of the chicken (*Gallus domes-*  
991 *ticus*) retina and the effect of amblyopia in neonatal chicken. *Microscopy*  
992 *Research and Technique* **69**(2), 99–107. doi:10.1002/jemt.20279.
- Webster, M.K., Barnett, B.J., Stanchfield, M.L., Paris, J.R., Webster,  
993 S.E., Cooley-Themm, C.A., Levine, E.M., Otteson, D.C. and Linn, C.L.  
994 (2019). Stimulation of retinal pigment epithelium with an  $\alpha$ nAChR agonist  
995 leads to Müller glia dependent neurogenesis in the adult mammalian retina.  
996 *Investigative Ophthalmology & Visual Science* **60**(2), 570. doi:10.1167/iov.  
997 18-25722.
- Williams, D.S., Arikawa, K. and Paallysaho, T. (1990). Cytoskeletal com-  
998 ponents of the adherens junctions between the photoreceptors and the sup-  
999 portive Müller cells. *Journal of Comparative Neurology* **295**(1), 155–164.  
1000 doi:10.1002/cne.902950113.
- Zang, J. and Neuhauss, S.C.F. (2021). Biochemistry and physiology of ze-  
1001 brafish photoreceptors. *Pflügers Archiv - European Journal of Physiology*  
1002 **473**(9), 1569–1585. doi:10.1007/s00424-021-02528-z.
- Zhang, D.S., Piazza, V., Perrin, B.J., Rzadzinska, A.K., Poczatek, J.C.,  
1003 Wang, M., Prosser, H.M., Ervasti, J.M., Corey, D.P. and Lechene,  
1004 C.P. (2012). Multi-isotope imaging mass spectrometry reveals slow protein  
1005 turnover in hair-cell stereocilia. *Nature* **481**(7382), 520–524. doi:10.1038/  
1006 nature10745.
- Zou, J., Wang, X. and Wei, X. (2012). Crb apical polarity proteins maintain  
1007 zebrafish retinal cone mosaics via intercellular binding of their extracellular  
1008 domains. *Developmental Cell* **22**(6), 1261–1274. doi:10.1016/j.devcel.2012.  
1009 03.007.



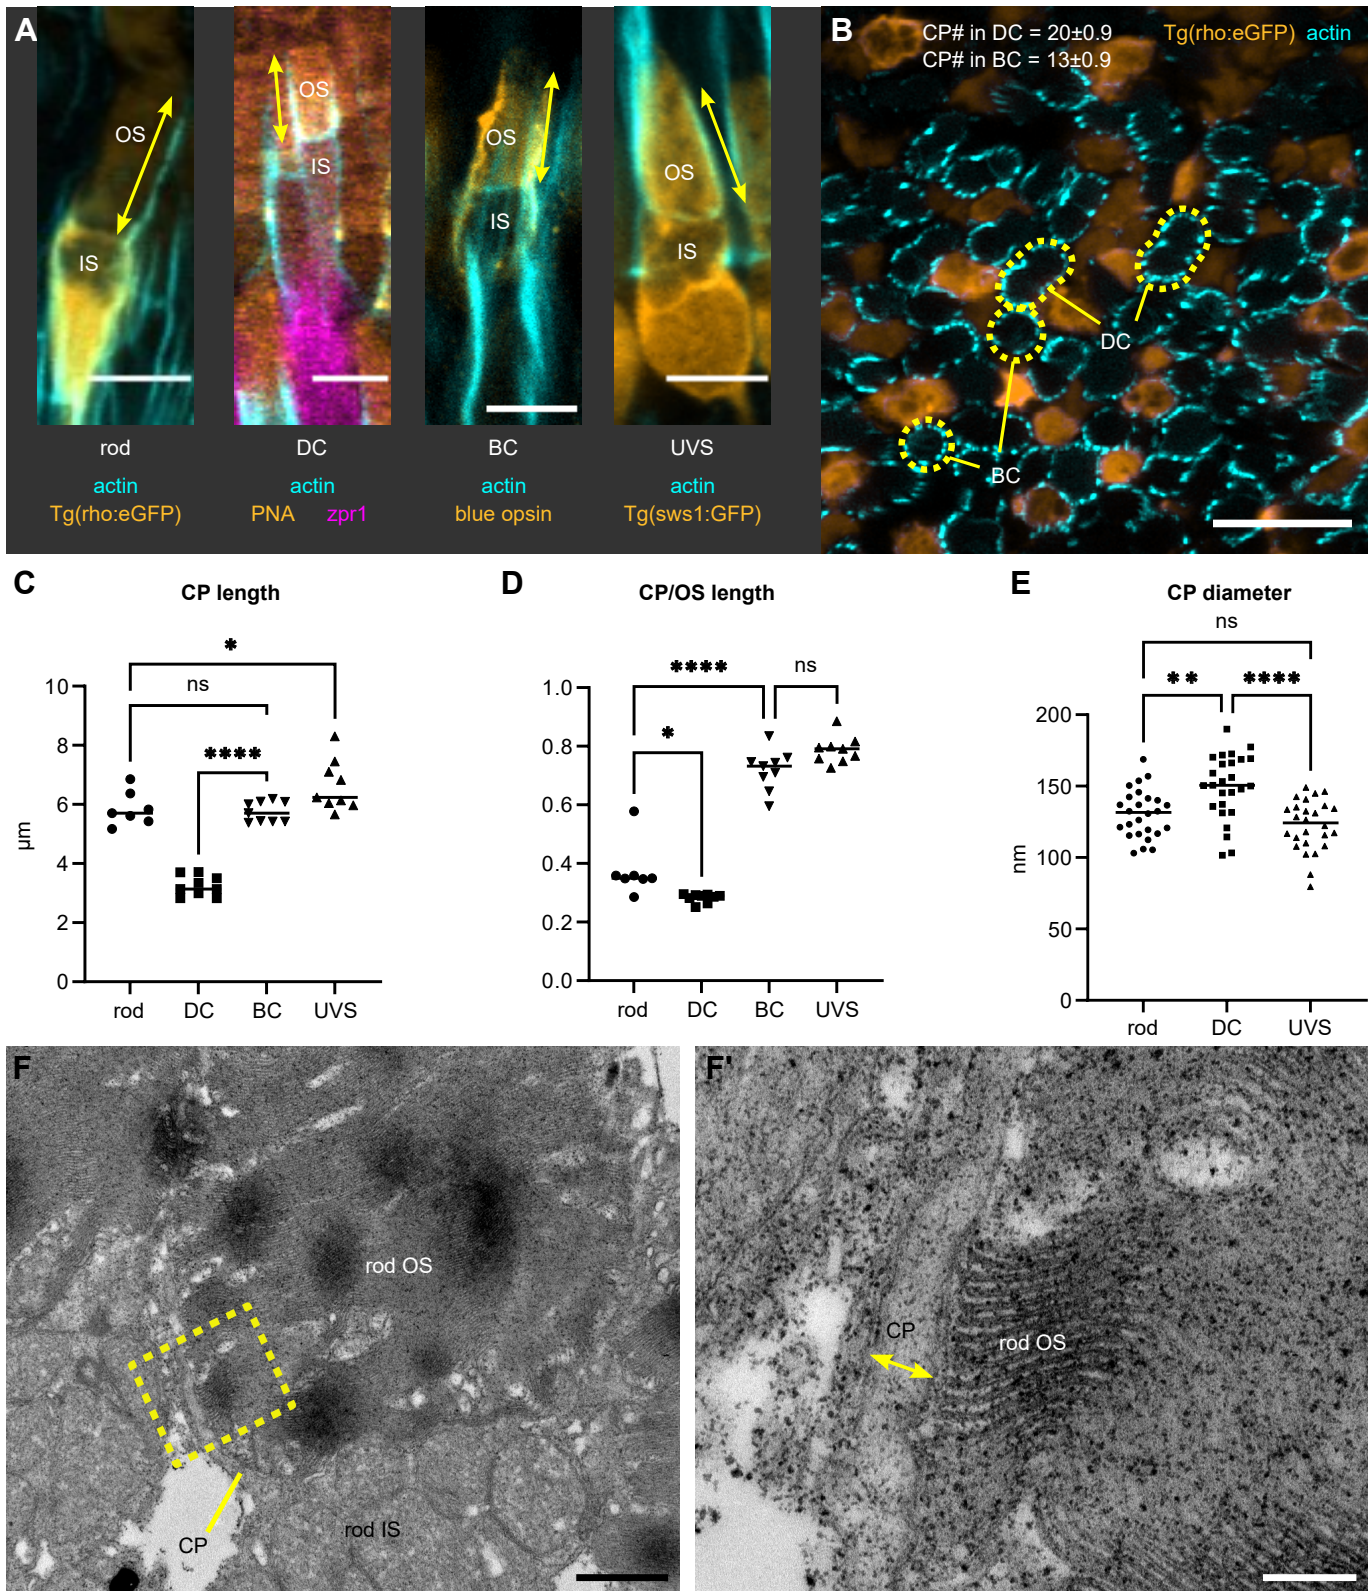

**Figure 1. CP parameters for photoreceptor subtypes in the juvenile zebrafish retina.** (A) Confocal images of 1 mpf retina stained with phalloidin (cyan). Dark-adapted rod (DA *Tg(rho:eGFP)*), light-adapted double cone (DC) (LA wild-type (WT) stained with PNA and *zpr1*), blue cone (BC) (LA WT stained with anti-blue opsin), and UV-sensitive cone (UVS) (LA *Tg(sws1:GFP)*); CP length is indicated by arrows. (B) Sagittal section through a 1 mpf DA *Tg(rho:eGFP)* retina (rods in orange) labeled with phalloidin (cyan). BC and DC OSs are outlined. For CP number, median and standard deviation are shown;  $n=5$  fish. The first two graphs display CP length (C) and CP length relative to the OS length (D) for LA DC, LA BC, LA UVS cones, and DA rods; number of fish  $n=9$  (DC, BC, UVS),  $n=7$  (rod). (E) Graph showing CP diameter measured in rods, DC, and UVS cones in TEM images of 1 mpf WT retina, with individual measurements plotted; number of fish  $n=5$ . Statistics (C–E): median is shown; one-way ANOVA with Tukey’s test; ns— $p>0.05$ , \*— $p<0.05$ , \*\*— $p<0.01$ , \*\*\*\*— $p<0.0001$ . (F) Example of TEM imaging used for measuring CP diameter. Lower magnification image showing rod OS, IS, and a CP, with a yellow contour indicating the area in (F’), where CP diameter is labeled. Scale bars: 5  $\mu\text{m}$  (A), 10  $\mu\text{m}$  (B), 1  $\mu\text{m}$  (F), 200 nm (F’).



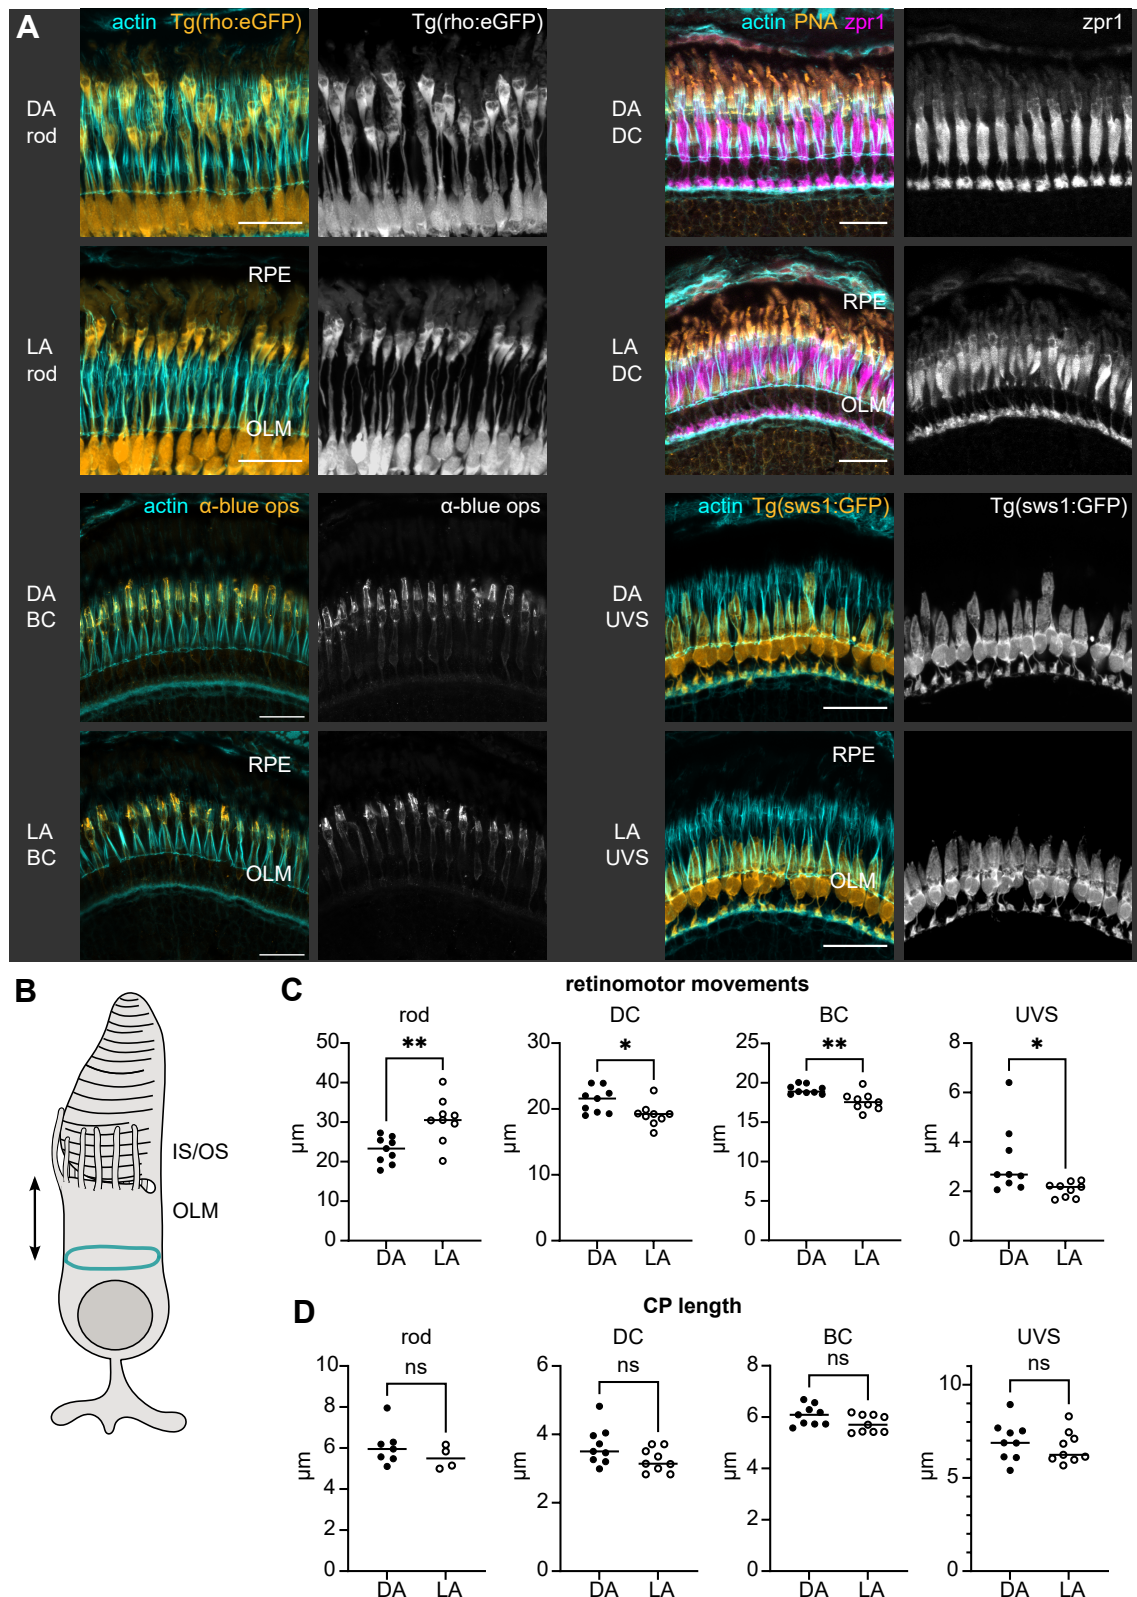

**Figure 2. Retinomotor movements and CP length in dark-adapted and light-adapted 1 mpf zebrafish retina.** (A) Confocal images of 1 mpf DA and LA outer retina sections stained with phalloidin (cyan). From left to right, top to bottom: rods (*Tg(rho:eGFP)*), double cones (DC) (WT stained with PNA and *zpr1*), blue cones (BC) (WT stained with anti-blue opsin), UV-sensitive cones (UVS) (*Tg(sws1:GFP)*). Scale bars: 20  $\mu\text{m}$ . (B) Schematic depiction of measurement for the IS–OLM distance. (C) The graphs show the extent of cellular retinomotor movements as a distance between the apical IS and the OLM in each photoreceptor cell type, DA versus LA state. (D) Graphs displaying the CP length in photoreceptors in DA vs LA fish. Statistics: number of fish  $n=9$  (rods, DC, BC, UVS),  $n=7$  (rod DA CP length),  $n=4$  (rod LA CP length); median is shown; unpaired t-tests with Welch's correction; two-tailed p-value; ns— $p>0.05$ , \*— $p<0.05$ , \*\*— $p<0.01$ .



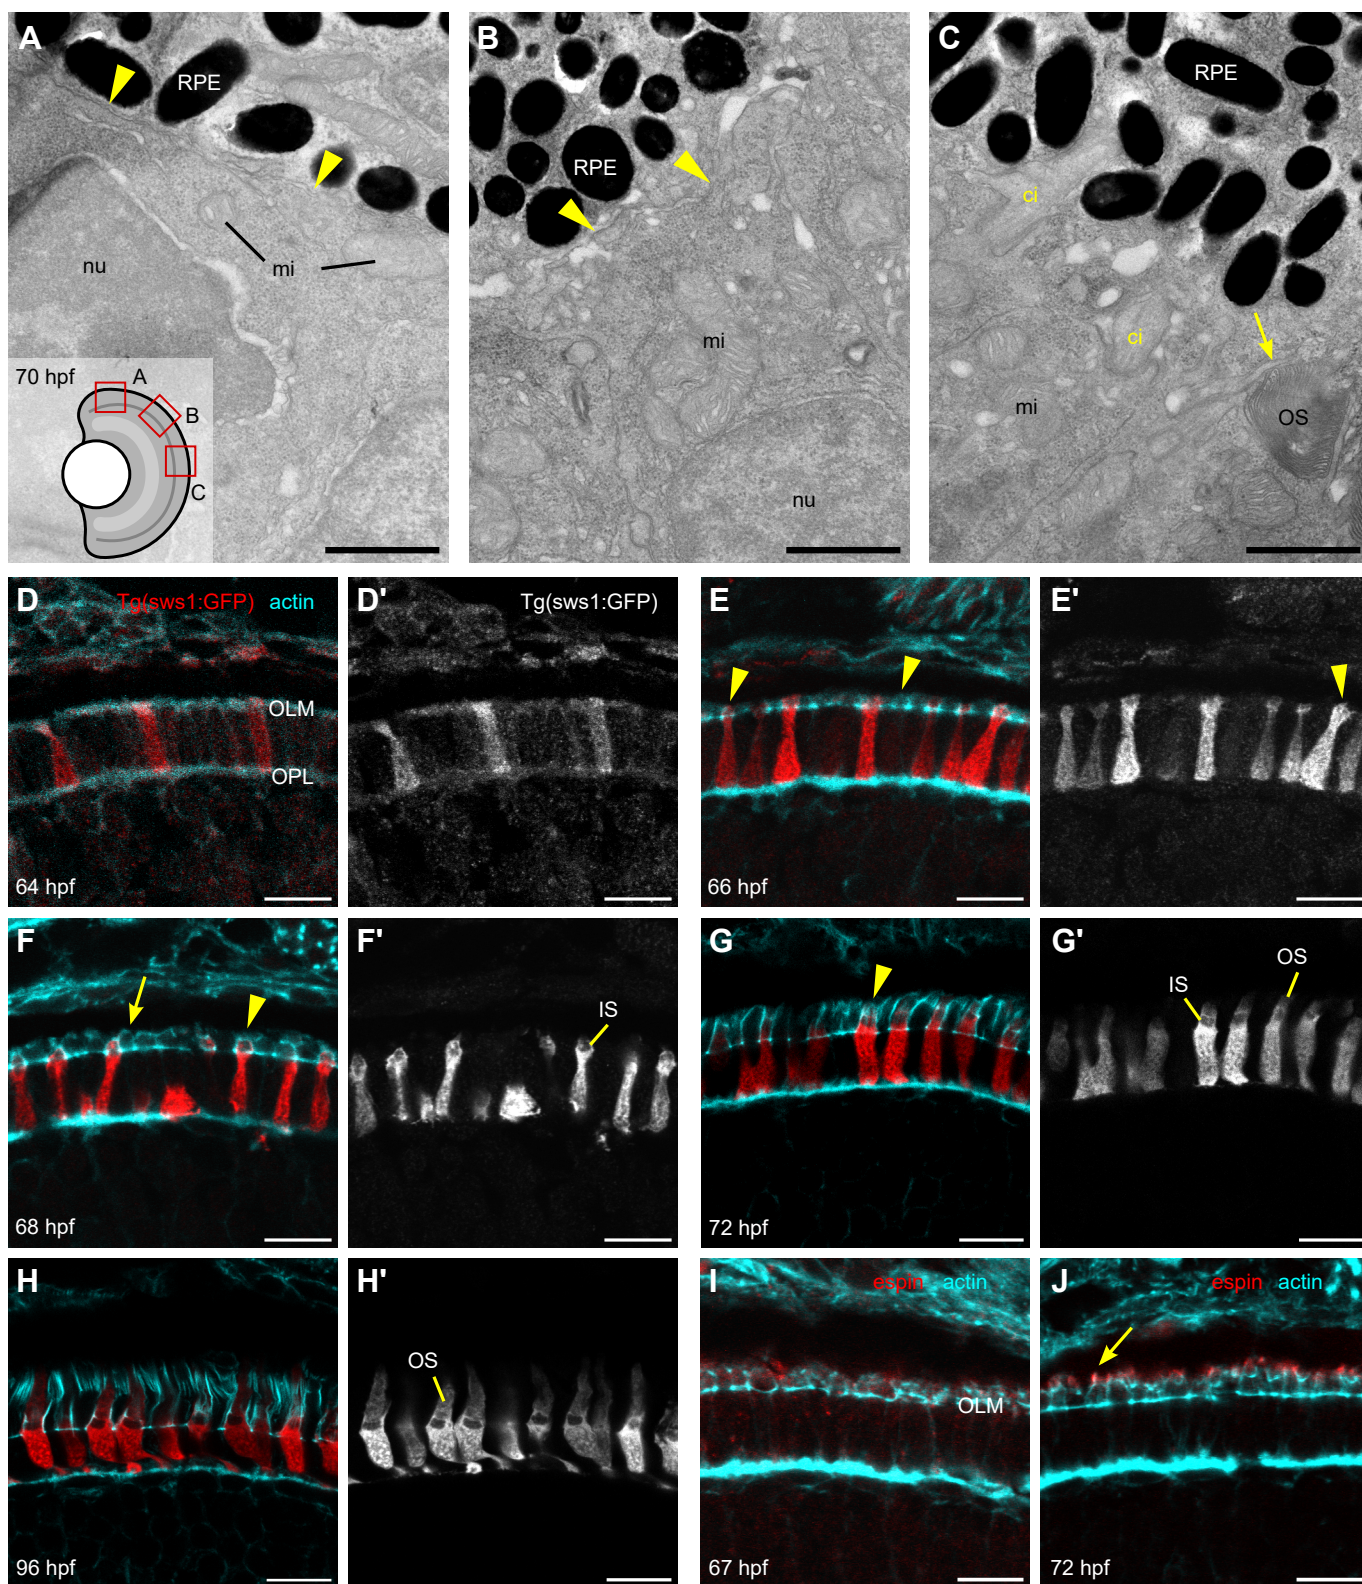

**Figure 3. Details of IS, OS, and CP development in zebrafish retina.** (A–C) TEM micrographs depicting the progression of IS and OS development in 70 hpf WT embryonic retina. A small schematic inset in A shows the approximate position of each panel. (A) Peripheral retina, the photoreceptor/RPE interface is flat, with an isolated apical photoreceptor process extending parallel to the interface, as indicated by arrowheads. mi - mitochondria; nu - nucleus. (B) When moving away from the periphery, processes (arrowheads) can be observed emerging from both the RPE and photoreceptor apical surfaces, creating an interdigitating IS/RPE interface. (C) Dorsocentral region, one photoreceptor has an OS with well-developed discs and a visible adjacent CP (arrow), while two other photoreceptors are at the emerging cilium (ci) stage. (D–H) Confocal images of *Tg(sws1:GFP)* (red) outer retina sections at 64, 66, 68, 72, and 96 hpf stained with phalloidin (cyan). (D) Early photoreceptors with a columnar morphology and an actin-rich apical domain, but no distinct IS. (E) Arrowheads pointing at actin dome-like structure in the IS; (E') filopodia emerging from IS apical surface (arrowhead). (F) Different IS/actin dome shapes: creating round and rectangular (arrow and arrowhead, respectively). (G) Arrowhead indicates CPs. (I, J) Confocal images of 67 and 72 hpf outer retina sections stained with phalloidin (cyan) and anti-espin (red). (J) An arrow highlights espin localization to the CPs in 72 hpf fish. Number of fish analyzed n=3 (A–C), n=7 (D), n=5 (E), n=8 (F, G), n=6 (H), n=4 (I, J). Scale bars: 1  $\mu$ m (A–C), 10  $\mu$ m (D–J).



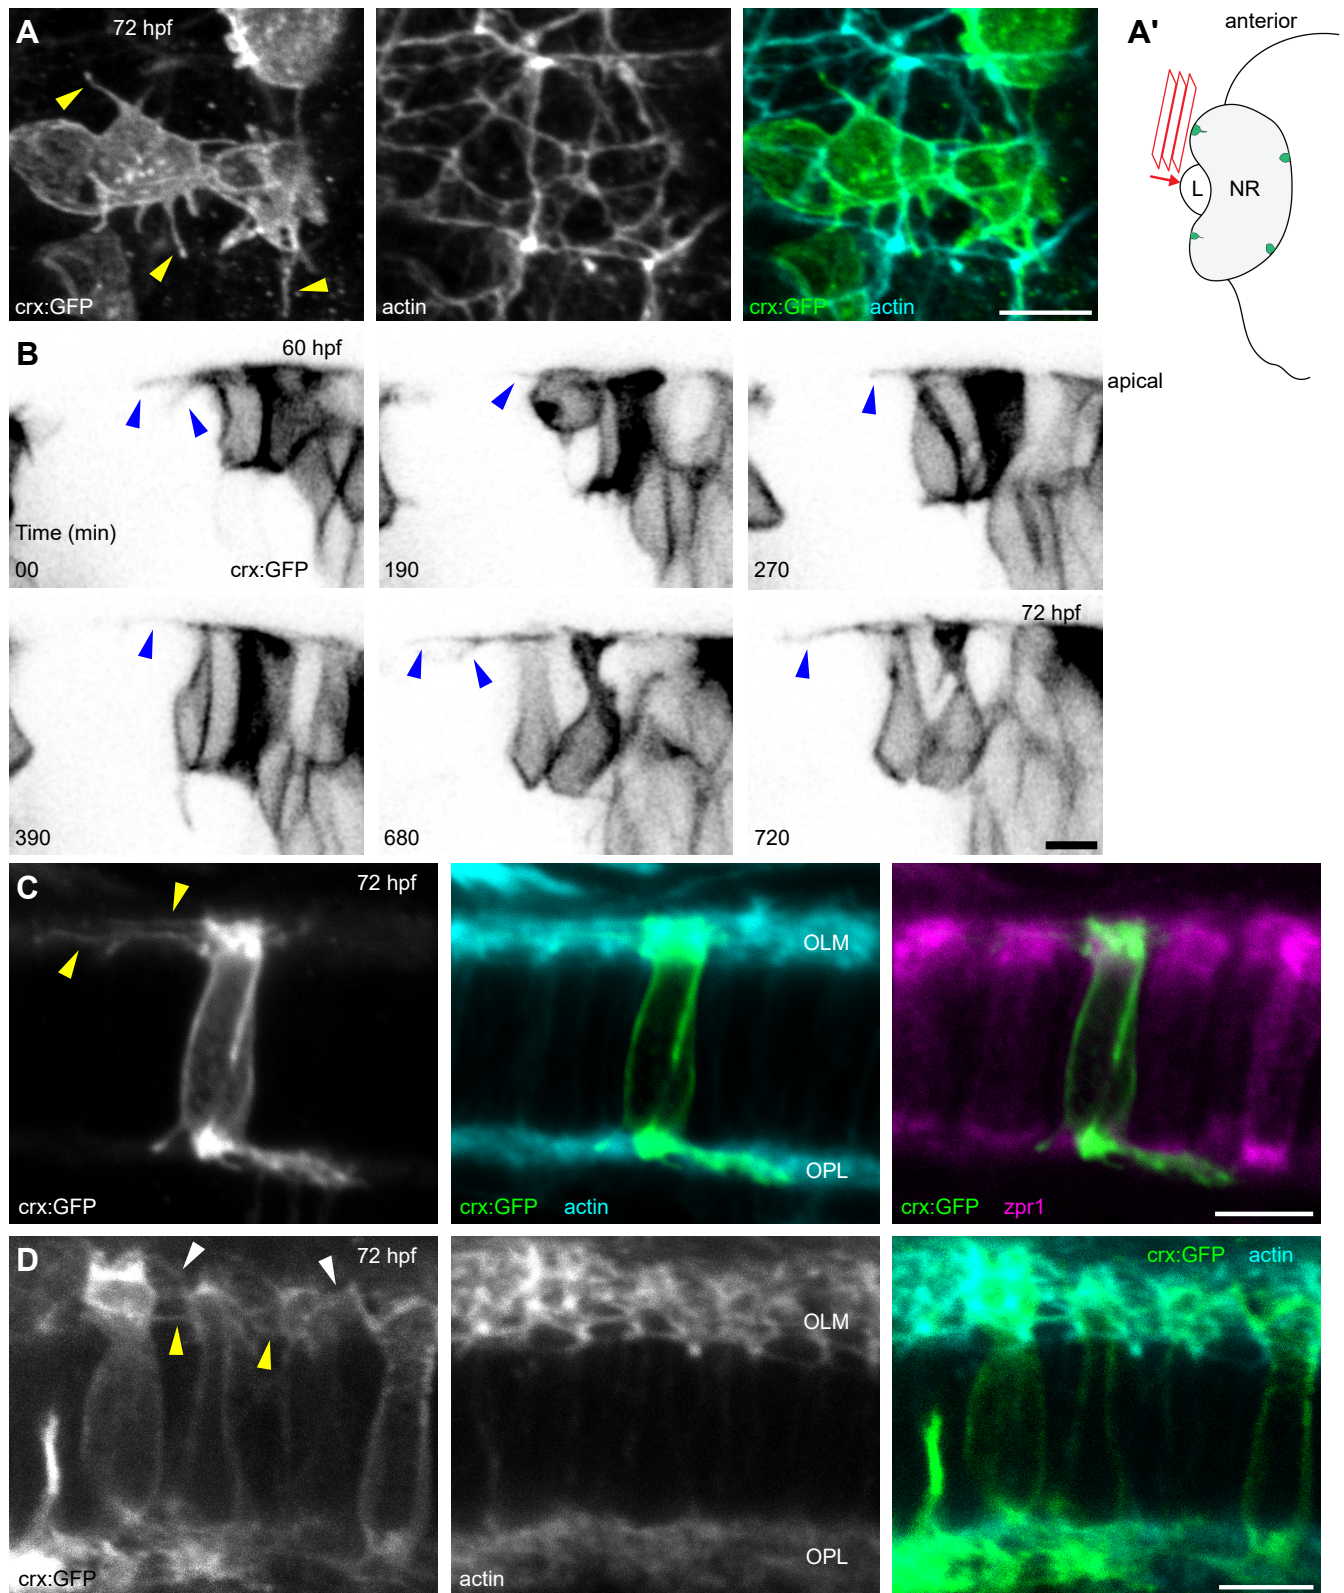

**Figure 4. Tangential processes on photoreceptor progenitors and differentiating photoreceptors in the 72 hpf retina.** (A) Apical view of the peripheral-most *crx:EGFP-CAAX* (*crx:GFP*) expression area, showing a few photoreceptor progenitors profusely extending tangential processes (arrowheads). F-actin staining with TRITC-phalloidin highlights the sub-apical adhesion rings. (A') Diagram depicting the orientation of acquisition in (A); L — lens, NR — neural retina. (B) Time-lapse experiment of *crx:GFP*-injected embryos, showing a peripheral area of the retina displaying photoreceptor progenitors extending highly dynamic tangential processes on the apical surface (arrowheads). (C) Early differentiating photoreceptor, displaying long tangential processes (arrowheads). (D) Differentiating photoreceptors at the IS-forming stage, showing short processes extending from this expanding apical membrane. Some of the processes are connected at the OLM, indicating they might be tangential processes (yellow arrowheads), while others originate at more apical positions and extend in different directions (white arrowheads). Number of embryos analyzed n=8 (A,C,D), n=4 (B). Scale bars: 5  $\mu$ m.



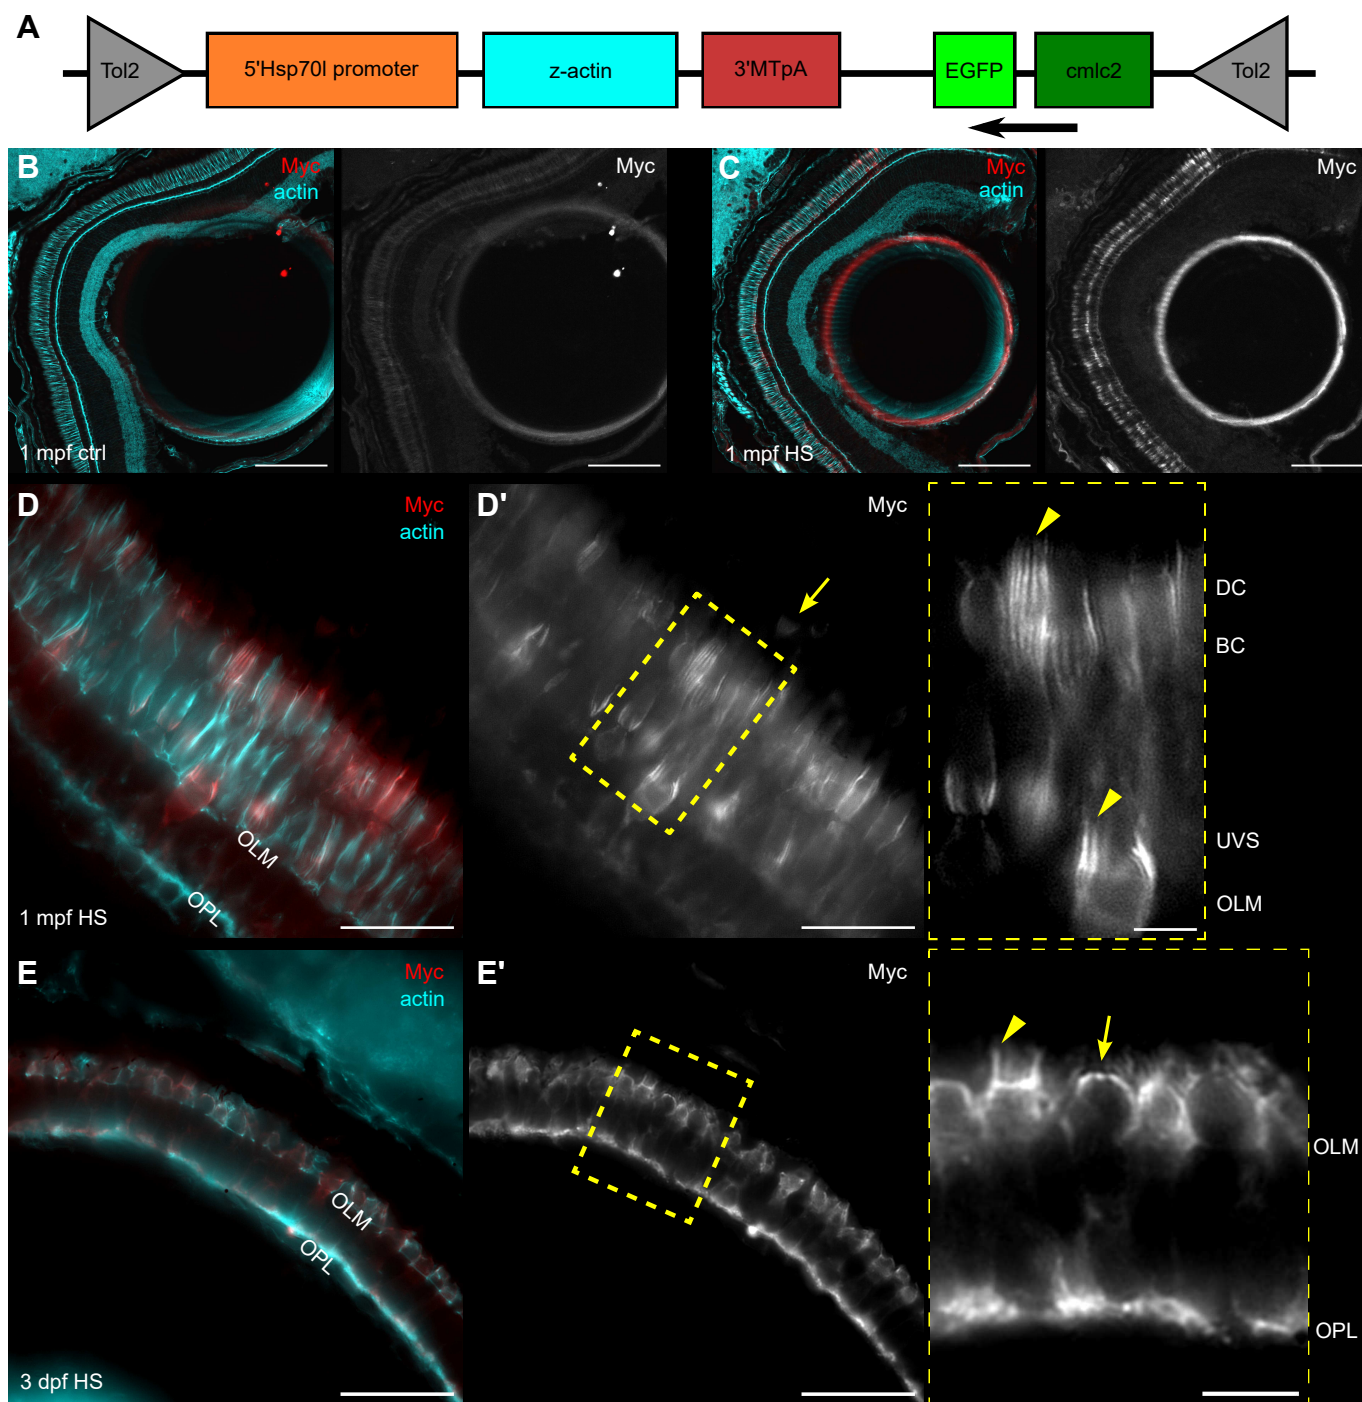

**Figure 5. Induced actin is incorporated into CP cores in zebrafish.** (A) Graph representing various components of the construct injected into 1-cell stage WT embryos. (B–E) Micrographs of *Tg(hsp:act-myc)* zebrafish retina stained with phalloidin and anti-myc antibody. (B) Control 1 mpf *Tg(hsp:act-myc)* eye. (C) Eye of 1 mpf *Tg(hsp:act-myc)* fish 24 h after heat shock (HS). (D) Higher magnification of a photoreceptor layer of heat shock treated 1 mpf fish; arrow in (D') points at the rod IS; inset shows enlarged yellow box contents from (D'), arrowheads highlight myc localization to CPs. (E) 3 dpf *Tg(hsp:act-myc)* embryo 6 h after heat shock. (E') Yellow box indicates position of enlarged area in the inset; actin-myc expression in the IS actin dome (arrow), and in the CPs (arrowhead). Number of fish analyzed n=11 (B), n=12 (C), n=7 (D), n=11 (E). Scale bars: 100 μm (B,C), 20 μm (D–E), 5 μm (insets).

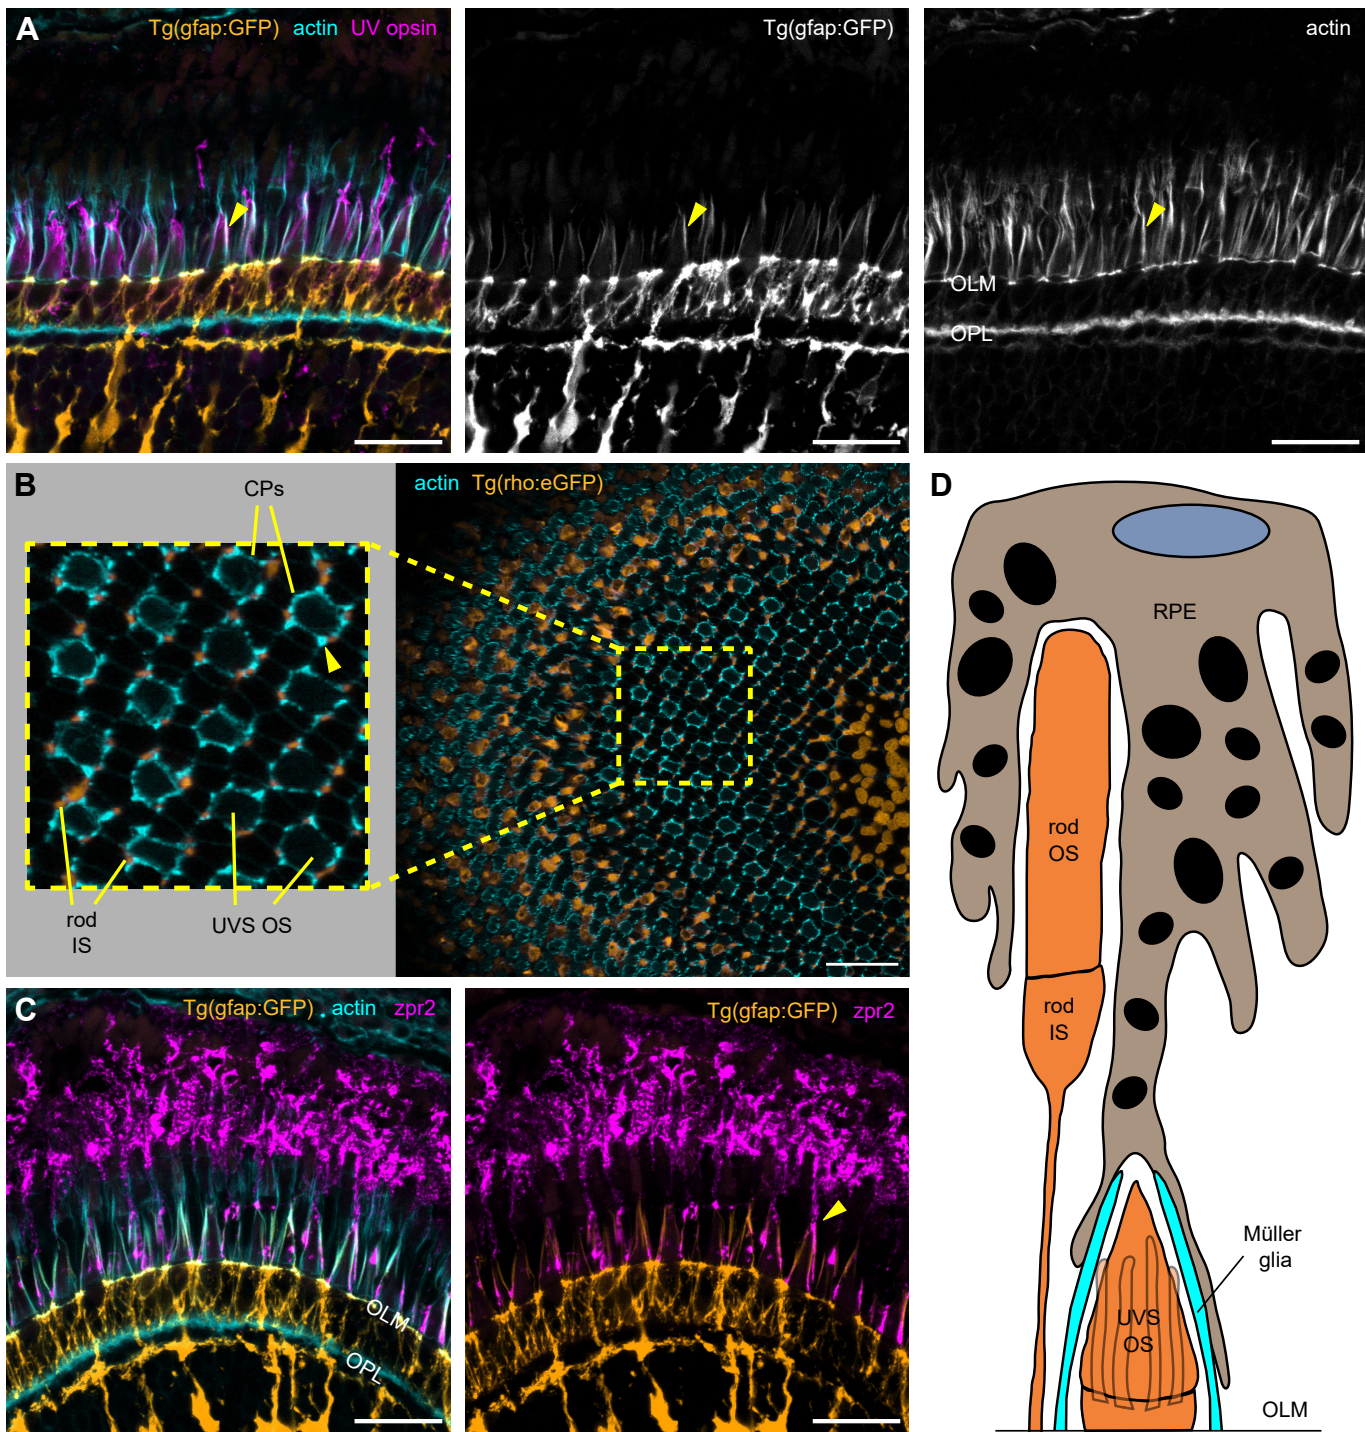

**Figure 6. Zebrafish Müller glia and RPE protrusions enclose UVS cones OSs.** (A–C) Confocal images of 1 mpf zebrafish retina sections incubated with phalloidin (cyan) and UV opsin or zpr2 antibody (magenta). (A) *Tg(gfap:GFP)* zebrafish with Müller glia cell bodies highlighted by GFP (orange) show long glial processes above the OLM stretching alongside UVS cone OSs and colocalizing with thick actin bundles (arrowheads). (B) Sagittal section through *Tg(rho:eGFP)* retina with an enlarged area demonstrating rod ISs (orange) adjacent to thick actin bundles (arrowhead) surrounding UVS cones OSs. (C) RPE apical villi, stained with zpr2 antibody, extend towards the OLM and localize in close proximity to the apical Müller glia processes, as observed in *Tg(gfap:GFP)* retina. (D) A model illustrating the organization of supporting cells in the photoreceptor layer. UVS cones feature both Müller glia and RPE protrusions around the OS. Number of fish analyzed n=3 (A,C), n=5 (B). Scale bars: 20  $\mu$ m (A–C).



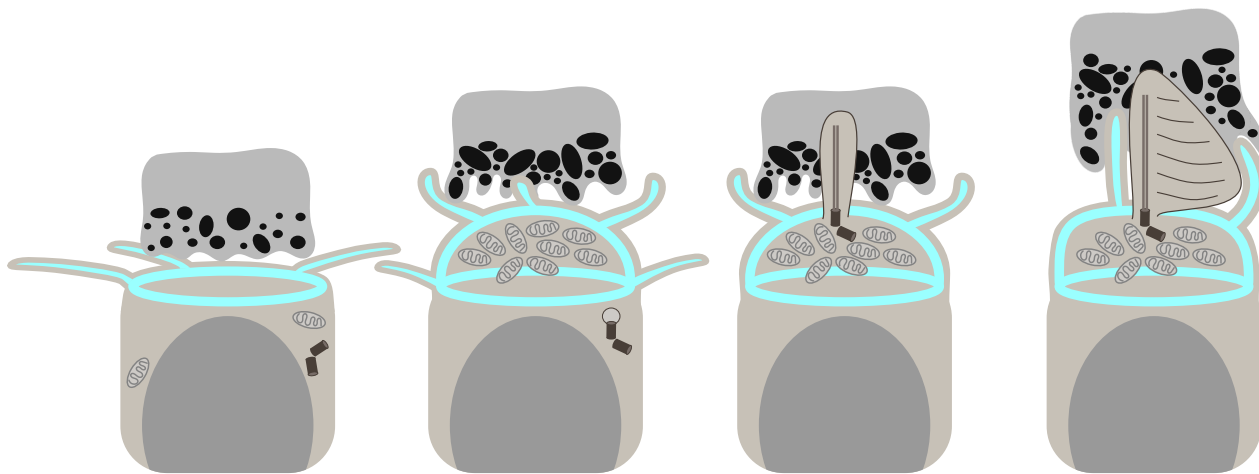

**Figure 7. Diagram depicting stages of photoreceptor CP, IS, and OS development in embryonic zebrafish.** From left to right: CPs, IS, and OS of zebrafish photoreceptors undergo distinct alterations during development. First on the left: no distinct IS is observed; photoreceptors feature tangential processes apically, an actin ring at the OLM, and flat RPE/IS interface. Next, the IS becomes prominent, outlined by an actin dome, and vertical processes (presumably CP precursors) appear, while the RPE/IS interface becomes rougher. Tangential processes originating near the OLM area are retained. Further, a cilium, the future OS, emerges and enters the RPE pocket, with no processes adjacent to it. Finally, the cilium starts generating discs, the CPs associate with the new OS, and the IS becomes more rectangular in shape. Please note that the diagram does not accurately depict relative sizes of photoreceptors and RPE in order to highlight the apical region of the former.
